# Supplementary material for: Theoretical insights into surface-phase transition and ion competition during alkali ion intercalation on the Cu4Se4 nanosheet
Source: Royal Society of Chemistry journal article supplement (doi:10.1039/d3cp05423c), 2023-11-21
Supplement: d3cp05423c1.pdf [file d3cp05423c1.pdf]

Electronic supplementary information

## **Theoretical insights into surface-phase transition and ion competition during alkali ion intercalation on the Cu<sub>4</sub>Se<sub>4</sub> nanosheet**

Yang-Xin Yu \*

*Laboratory of Chemical Engineering Thermodynamics, Department of Chemical Engineering,*

*Tsinghua University, Beijing 100084, People's Republic of China*

\*Email: yangxyu@mail.tsinghua.edu.cn

|                 |     |
|-----------------|-----|
| Table S1.....   | S3  |
| Table S2.....   | S3  |
| Table S3.....   | S4  |
| Figure S1.....  | S4  |
| Figure S2.....  | S4  |
| Figure S3.....  | S5  |
| Figure S4.....  | S5  |
| Figure S5.....  | S6  |
| Figure S6.....  | S7  |
| Figure S7.....  | S8  |
| Figure S8.....  | S9  |
| Figure S9.....  | S10 |
| Figure S10..... | S11 |
| Figure S11..... | S12 |
| Figure S12..... | S13 |
| Figure S13..... | S14 |
| Figure S14..... | S15 |
| Figure S15..... | S16 |
| Figure S16..... | S17 |
| Figure S17..... | S17 |
| Figure S18..... | S18 |
| Figure S19..... | S19 |
| Figure S20..... | S20 |
| Figure S21..... | S21 |
| Figure S22..... | S21 |
| Figure S23..... | S22 |
| Figure S24..... | S23 |
| Figure S25..... | S24 |
| Figure S26..... | S24 |

Table S1 presents the structural parameter of monolayer, bilayer, trilayer, four-layer and bulk CuSe crystal. The vibrational frequencies of the Cu<sub>4</sub>Se<sub>4</sub> nanosheet is given in Table S2. The geometric structures and cohesive energies of monolayer, bilayer, trilayer and four-layer CuSe nanosheet are plotted in Figures S1-S4, respectively.

All possible configurations of two, four, six, eight, ten, twelve, fourteen, sixteen sodium atoms adsorbed on the Cu<sub>4</sub>Se<sub>4</sub> nanosheet are shown in Figures S5-S12, respectively, and those for potassium atoms are given in Figures S13-S20.

Figures S21-S25 are the geometric structures and adsorption energy of protons on the Cu<sub>4</sub>Se<sub>4</sub> nanosheet with different intercalated proton number, where the adsorption energy of protons,  $E_H$ , is defined as

$$E_H = \left( E_{H_n(\text{Cu}_4\text{Se}_4)_9} - E_{(\text{Cu}_4\text{Se}_4)_9} - nE_{\text{H}_2} / 2 \right) / n \quad (\text{S1})$$

where  $E_{H_n(\text{Cu}_4\text{Se}_4)_9}$ ,  $E_{(\text{Cu}_4\text{Se}_4)_9}$ , and  $E_{\text{H}_2}$  are energies of the proton intercalated system, Cu<sub>4</sub>Se<sub>4</sub> nanosheet and a hydrogen molecule in the gas phase.

**Table S1** Crystal lattice constants ( $a$ ,  $c$ ), bond lengths ( $l_{\text{Ch1-Cu1}}$ ,  $l_{\text{Ch2-Cu2}}$ ,  $l_{\text{Ch1-Cu2}}$ , and  $l_{\text{Ch2-Ch2}}$ ) and cohesive energies ( $E_{\text{coh}}$ ) of CuSe bulk crystals and nano-layers

| Materials                          | $a$ , $c$ (Å) | $l_{\text{Se1-Cu1}}$ (Å) | $l_{\text{Se2-Cu2}}$ (Å) | $l_{\text{Se1-Cu2}}$ (Å) | $l_{\text{Se2-Se2}}$ (Å) | $E_{\text{coh}}$<br>(eV/atom) |
|------------------------------------|---------------|--------------------------|--------------------------|--------------------------|--------------------------|-------------------------------|
| Monolayer                          |               |                          |                          |                          |                          |                               |
| CuSe-a                             | 3.756, 30.0   | 2.308                    |                          |                          |                          | -2.948                        |
| CuSe-b                             | 3.977, 30.0   | 2.295/2.303              |                          |                          |                          | -2.945                        |
| Bilayer                            |               |                          |                          |                          |                          |                               |
| Cu <sub>2</sub> Se <sub>2</sub> -a | 4.059, 30.0   |                          | 2.345                    |                          | 2.651                    | -3.144                        |
| Cu <sub>2</sub> Se <sub>2</sub> -b | 3.690, 30.0   | 2.375                    | 2.404                    | 2.542                    |                          | -3.248                        |
| Trilayer                           |               |                          |                          |                          |                          |                               |
| Cu <sub>3</sub> Se <sub>3</sub> -a | 4.005, 30.0   | 2.315/2.363              | 2.435                    | 2.429                    | 2.507                    | -3.312                        |
| Cu <sub>3</sub> Se <sub>3</sub> -b | 3.889, 30.0   | 2.360                    | 2.364/2.376              | 2.455/2.485              |                          | -3.217                        |
| Tetralayer                         |               |                          |                          |                          |                          |                               |
| Cu <sub>4</sub> Se <sub>4</sub> -a | 3.912, 30.0   | 2.346                    | 2.412                    | 2.453                    | 2.425                    | -3.387                        |
| Cu <sub>4</sub> Se <sub>4</sub> -b | 3.928, 30.0   | 2.433                    | 2.271/2.379              | 2.332                    | 2.542                    | -3.331                        |
|                                    |               |                          | 2.386                    | 2.456                    |                          |                               |
| Bulk crystal                       |               |                          |                          |                          |                          |                               |
| CuSe(c)                            | 3.994, 17.215 | 2.306                    | 2.394                    | 2.445                    | 2.426                    | -3.442                        |
| CuSe(c,exp)                        | 3.938, 17.250 | 2.274                    | 2.391                    | 2.451                    | 2.386                    |                               |

**Table S2** Vibrational modes and frequencies of the Cu<sub>4</sub>Se<sub>4</sub> nanosheet.

| mode | Au_amu   | cm <sup>-1</sup> | meV   | THz   |
|------|----------|------------------|-------|-------|
| 1    | 0.005516 | 28.4             | 3.52  | 0.850 |
| 2    | 0.005588 | 28.7             | 3.56  | 0.861 |
| 3    | 0.012463 | 64.1             | 7.94  | 1.921 |
| 4    | 0.014540 | 74.7             | 9.27  | 2.241 |
| 5    | 0.015304 | 78.7             | 9.75  | 2.358 |
| 6    | 0.015718 | 80.8             | 10.02 | 2.422 |
| 7    | 0.015856 | 81.5             | 10.11 | 2.444 |
| 8    | 0.021733 | 111.7            | 13.85 | 3.349 |
| 9    | 0.024770 | 127.3            | 15.79 | 3.817 |
| 10   | 0.028402 | 146.0            | 18.10 | 4.377 |
| 11   | 0.035131 | 180.6            | 22.39 | 5.414 |
| 12   | 0.035147 | 180.7            | 22.40 | 5.417 |
| 13   | 0.040520 | 208.3            | 25.83 | 6.245 |
| 14   | 0.041926 | 215.5            | 26.72 | 6.461 |
| 15   | 0.042104 | 216.4            | 26.83 | 6.489 |
| 16   | 0.042763 | 219.8            | 27.26 | 6.590 |
| 17   | 0.042844 | 220.2            | 27.31 | 6.603 |
| 18   | 0.043175 | 221.9            | 27.52 | 6.654 |
| 19   | 0.046571 | 239.4            | 29.68 | 7.177 |
| 20   | 0.051162 | 263.0            | 32.61 | 7.884 |
| 21   | 0.051443 | 264.4            | 32.79 | 7.928 |

**Table S3** Calculated lattice parameters for pristine and Na/K intercalated  $\text{Cu}_4\text{Se}_4$  crystals

| Crystal                    | Space group | $a / \text{\AA}$ | $b / \text{\AA}$ | $c / \text{\AA}$ |
|----------------------------|-------------|------------------|------------------|------------------|
| $\text{Cu}_4\text{Se}_4$   | $P6_3/mmc$  | 3.898            | 3.898            | 24.151           |
| $\text{NaCu}_4\text{Se}_4$ | $P6_3/mmc$  | 4.029            | 4.029            | 24.819           |
| $\text{KCu}_4\text{Se}_4$  | $P6_3/mmc$  | 4.042            | 4.042            | 26.639           |

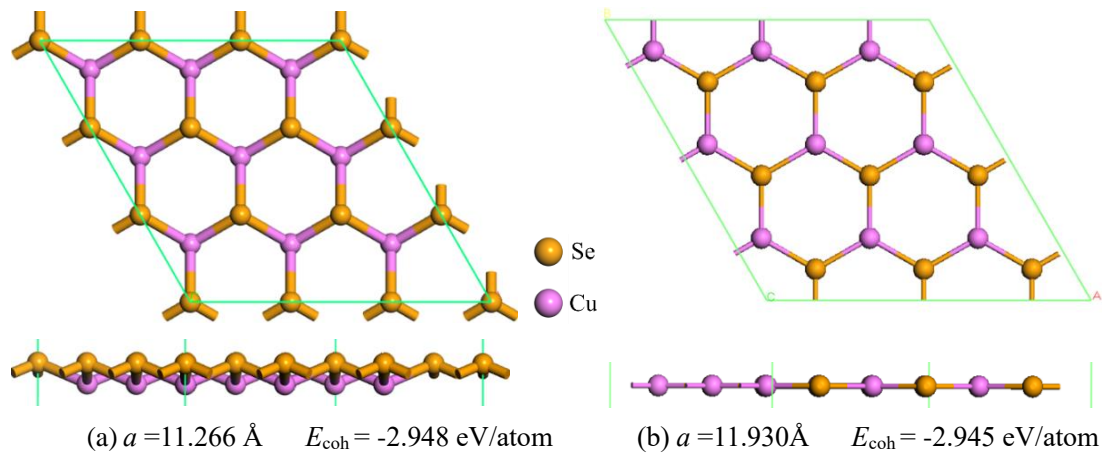**Fig. S1** Top and front views, lattice constants and cohesive energies of  $3 \times 3 \times 1$  CuSe monolayers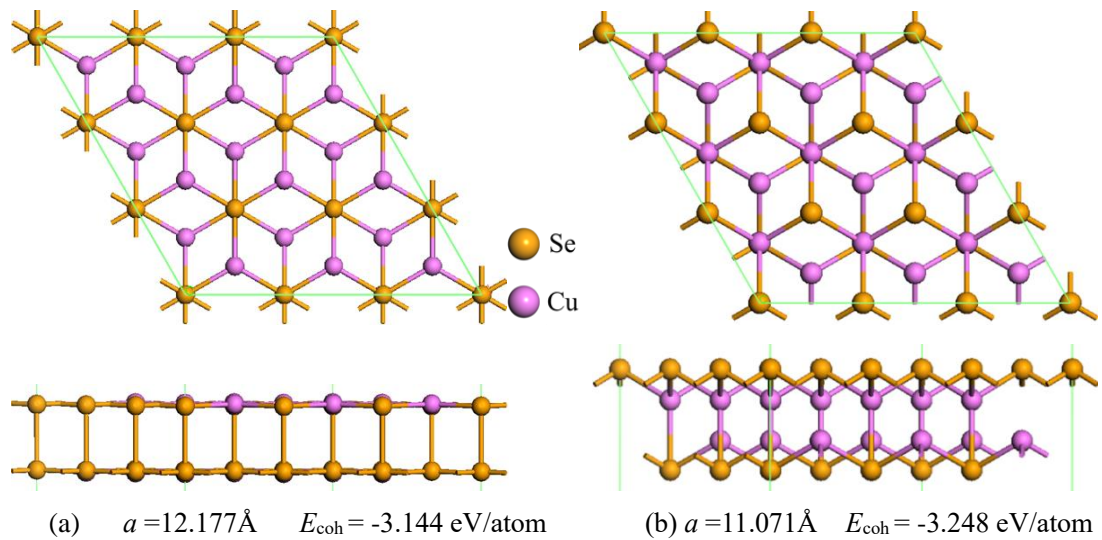**Fig. S2** Top and front views, lattice constants and cohesive energies of  $3 \times 3 \times 1$   $\text{Cu}_2\text{Se}_2$  sheets

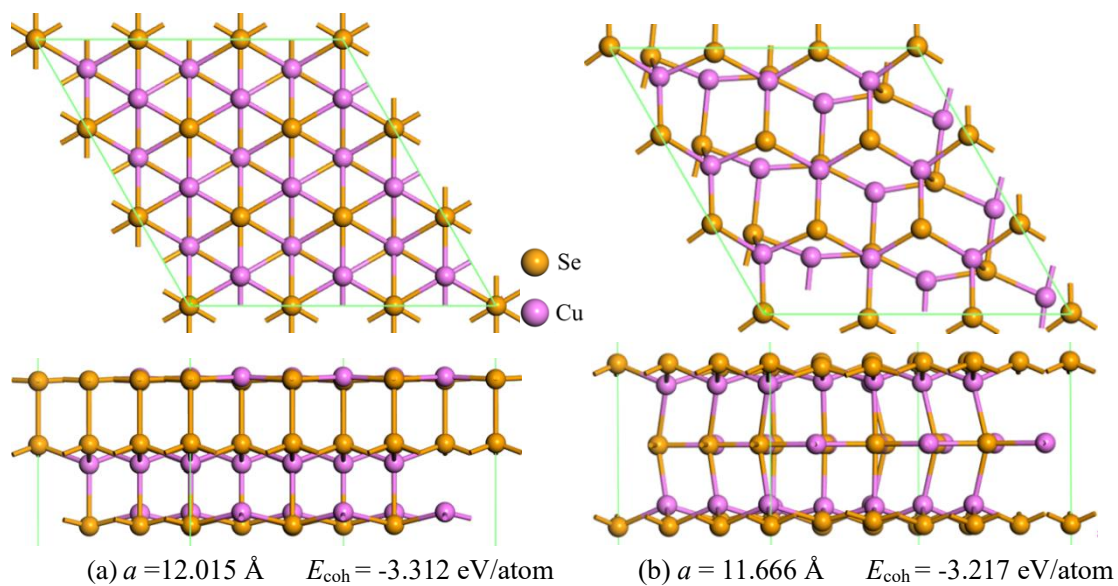

**Fig. S3** Top and front views, lattice constants and cohesive energies of  $3 \times 3 \times 1$   $\text{Cu}_3\text{Se}_3$  sheets

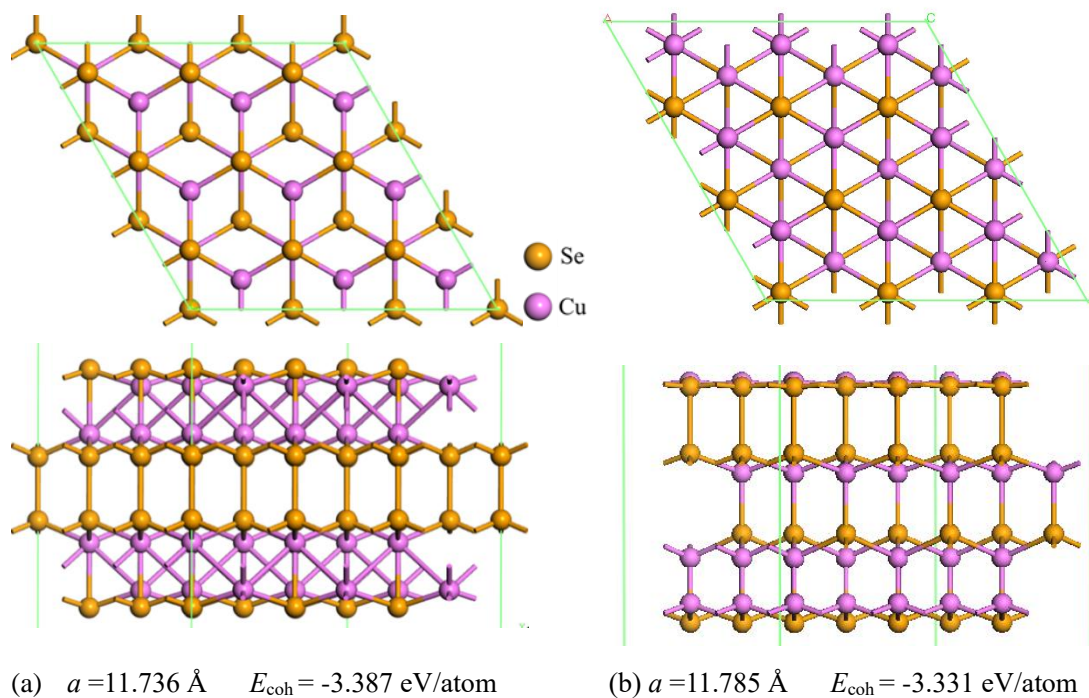

**Fig. S4** Top and front views, lattice constants and cohesive energies of  $3 \times 3 \times 1$   $\text{Cu}_4\text{Se}_4$  sheets

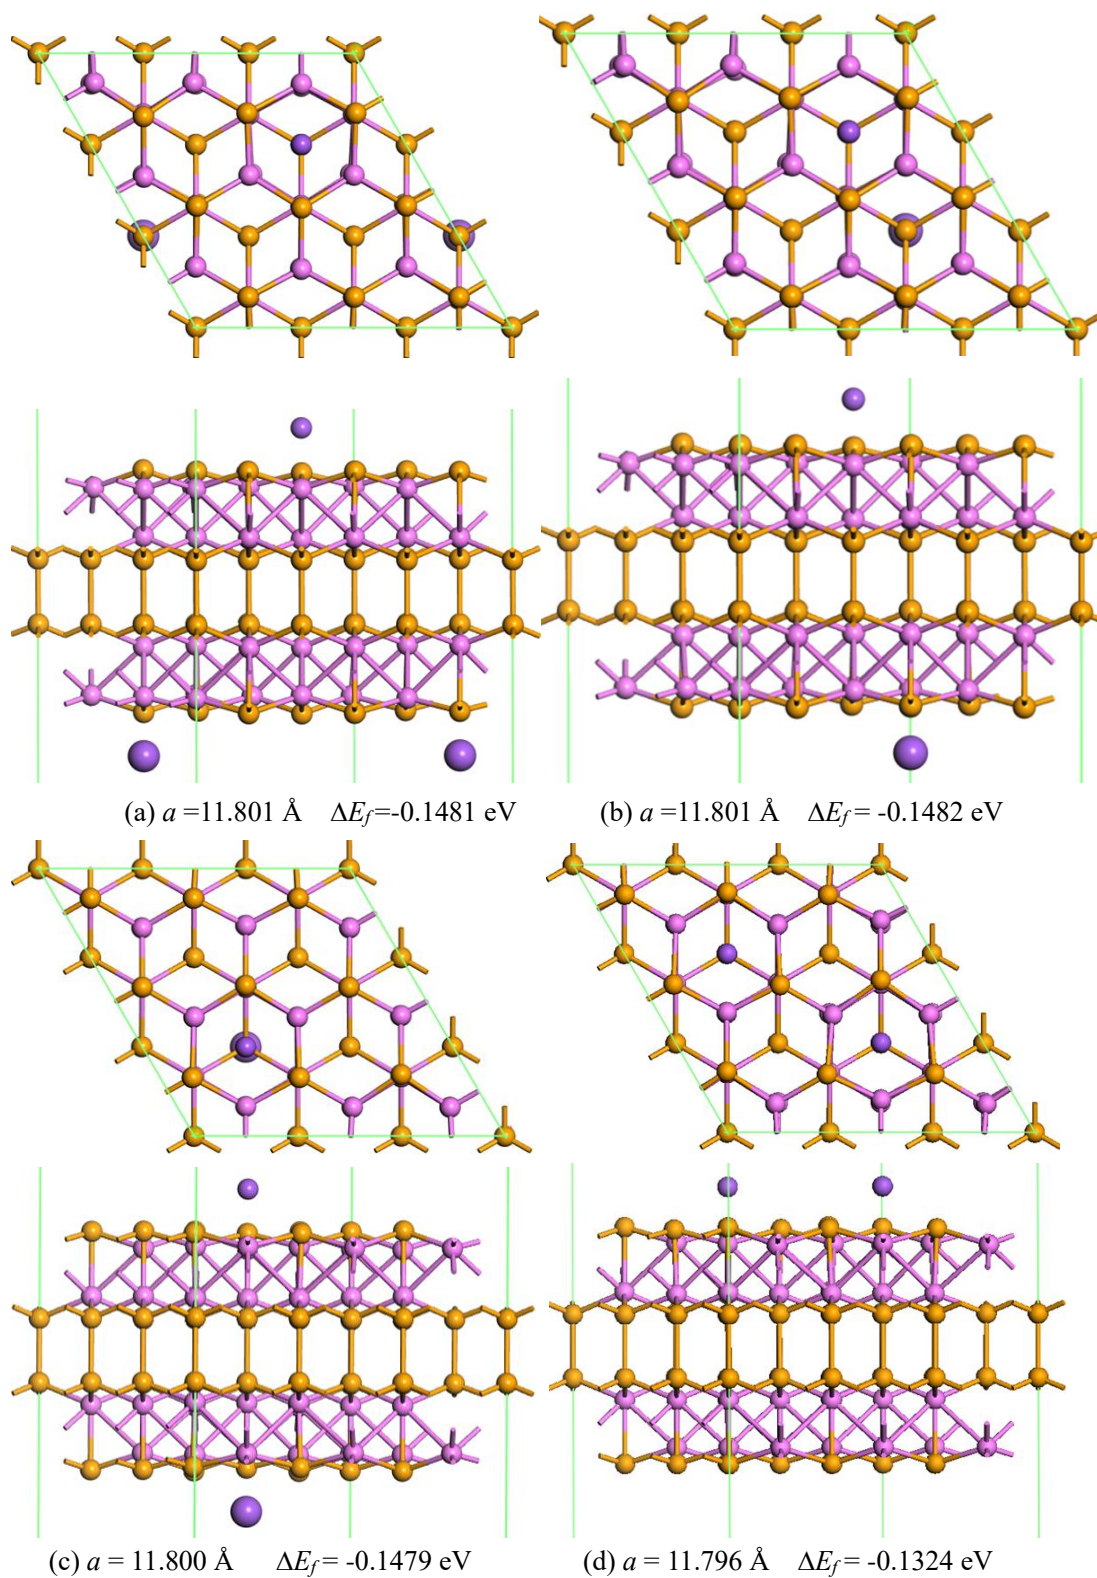

**Fig. S5** Top and front views of two sodium atoms adsorbed on the  $3 \times 3 \times 1$   $\text{Cu}_4\text{Se}_4$  supercell.

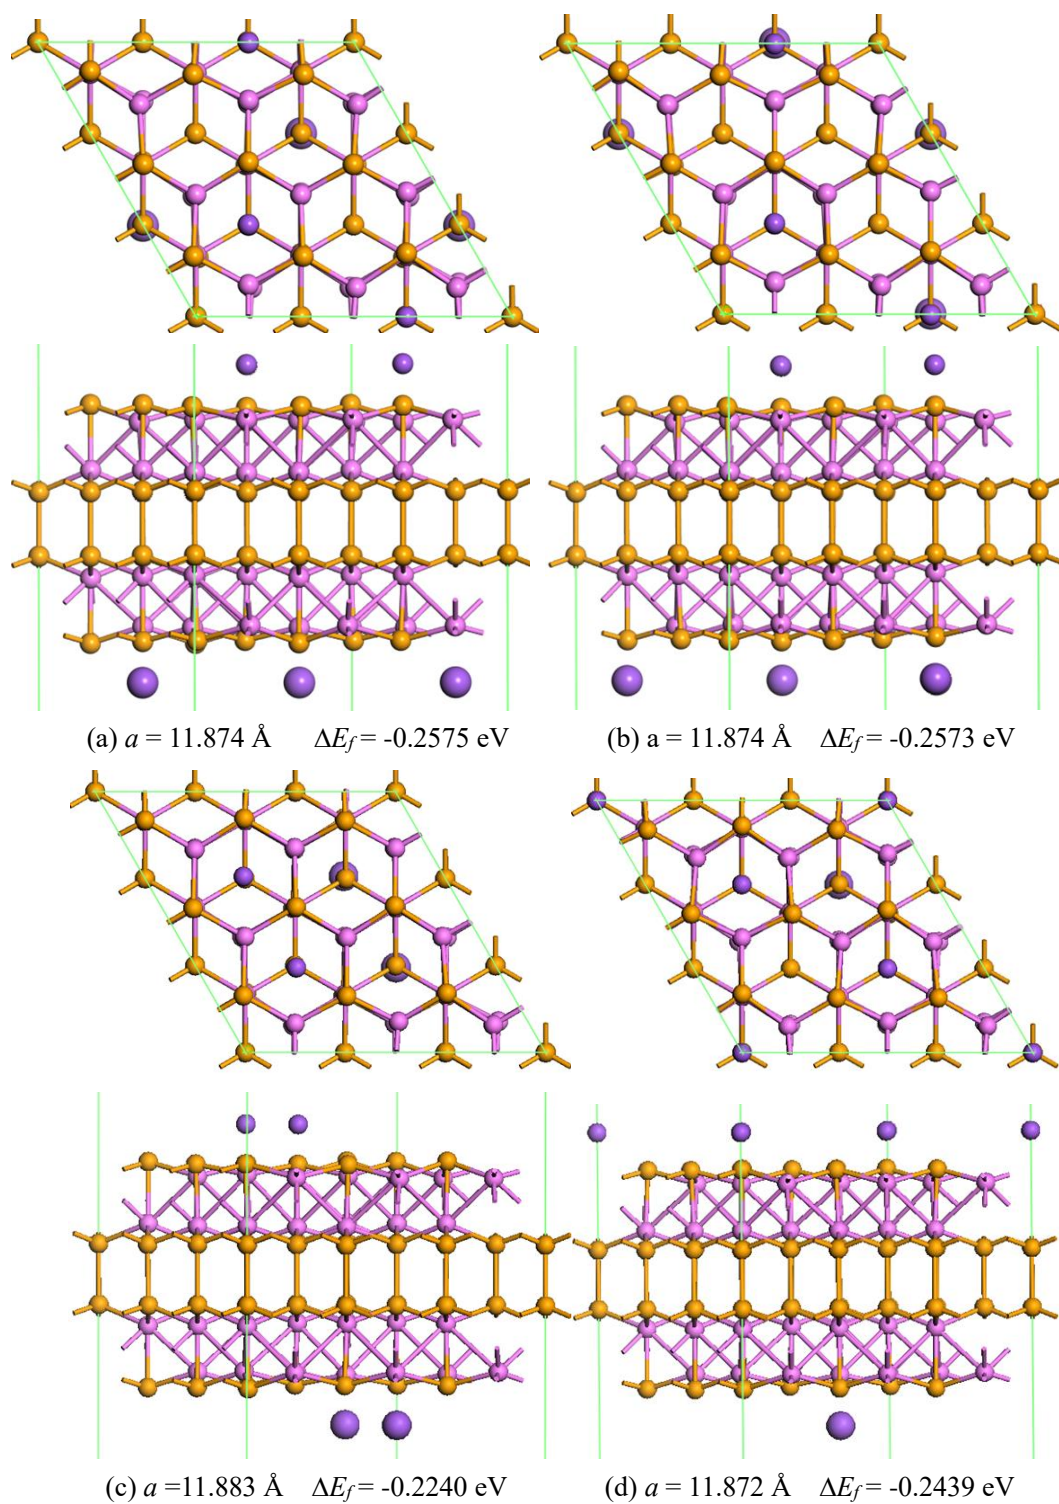

**Fig. S6** Top and front views of four sodium atoms adsorbed on the  $3 \times 3 \times 1$   $\text{Cu}_4\text{Se}_4$  supercell. The atoms for which balls in different colors stand are the same as in Fig. S5.

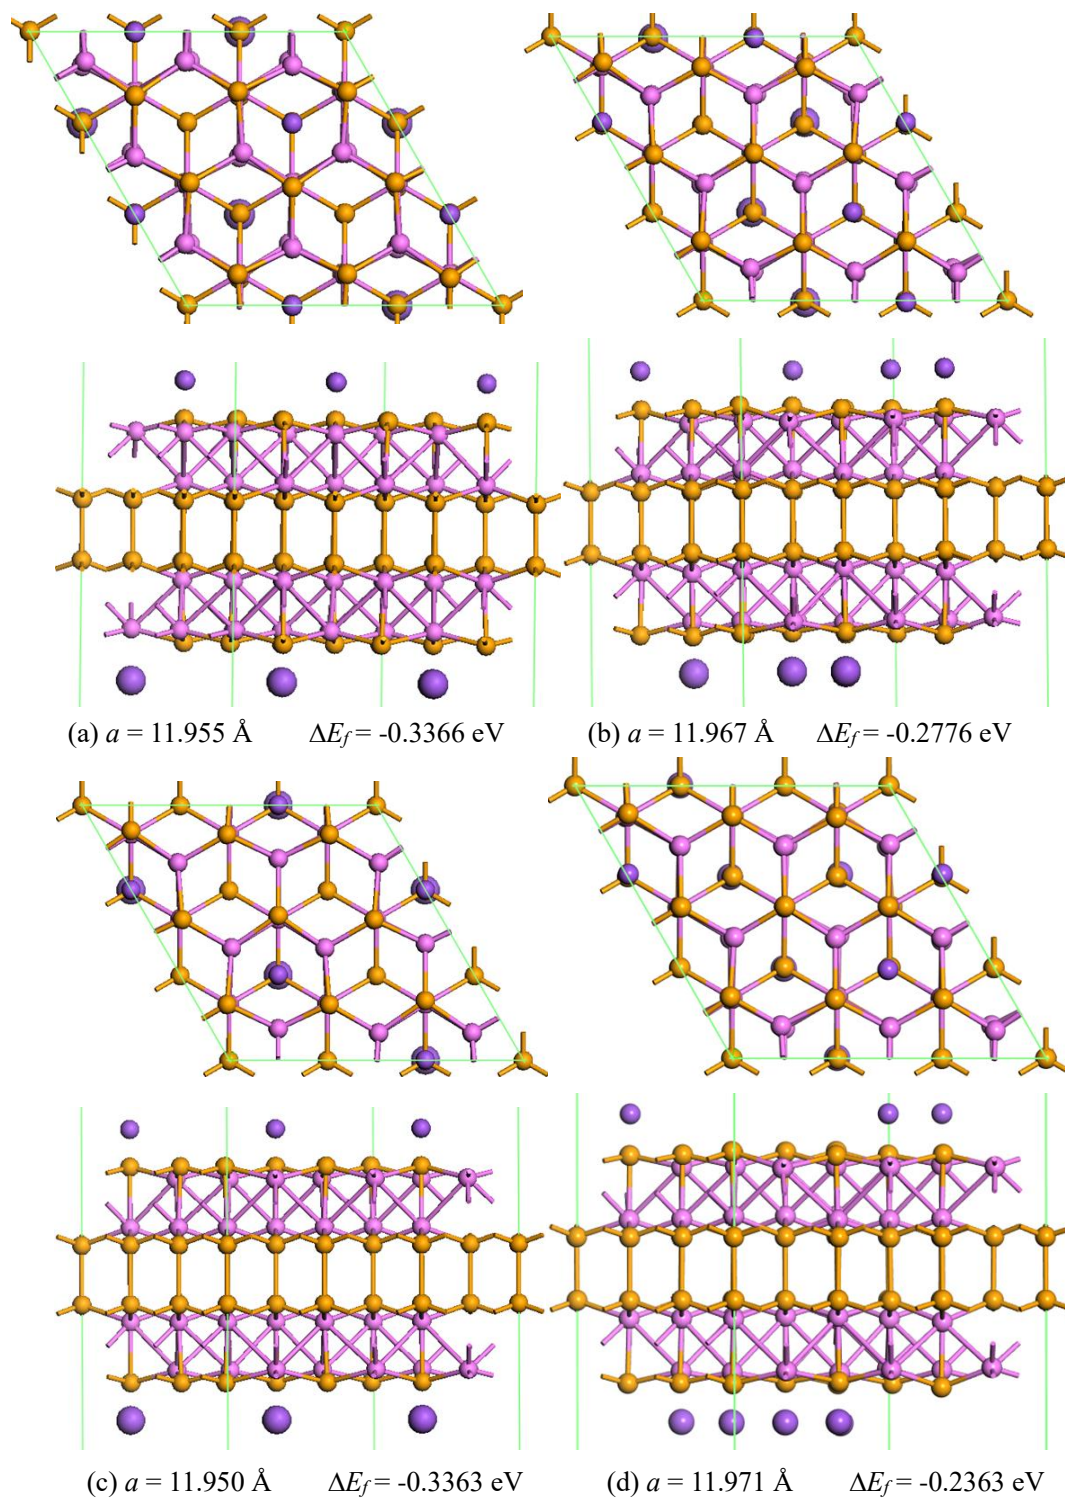

**Fig. S7** Top and front views of six sodium atoms adsorbed on the  $3 \times 3 \times 1$   $\text{Cu}_4\text{Se}_4$  supercell. The atoms for which balls in different colors stand are the same as in Fig. S5.



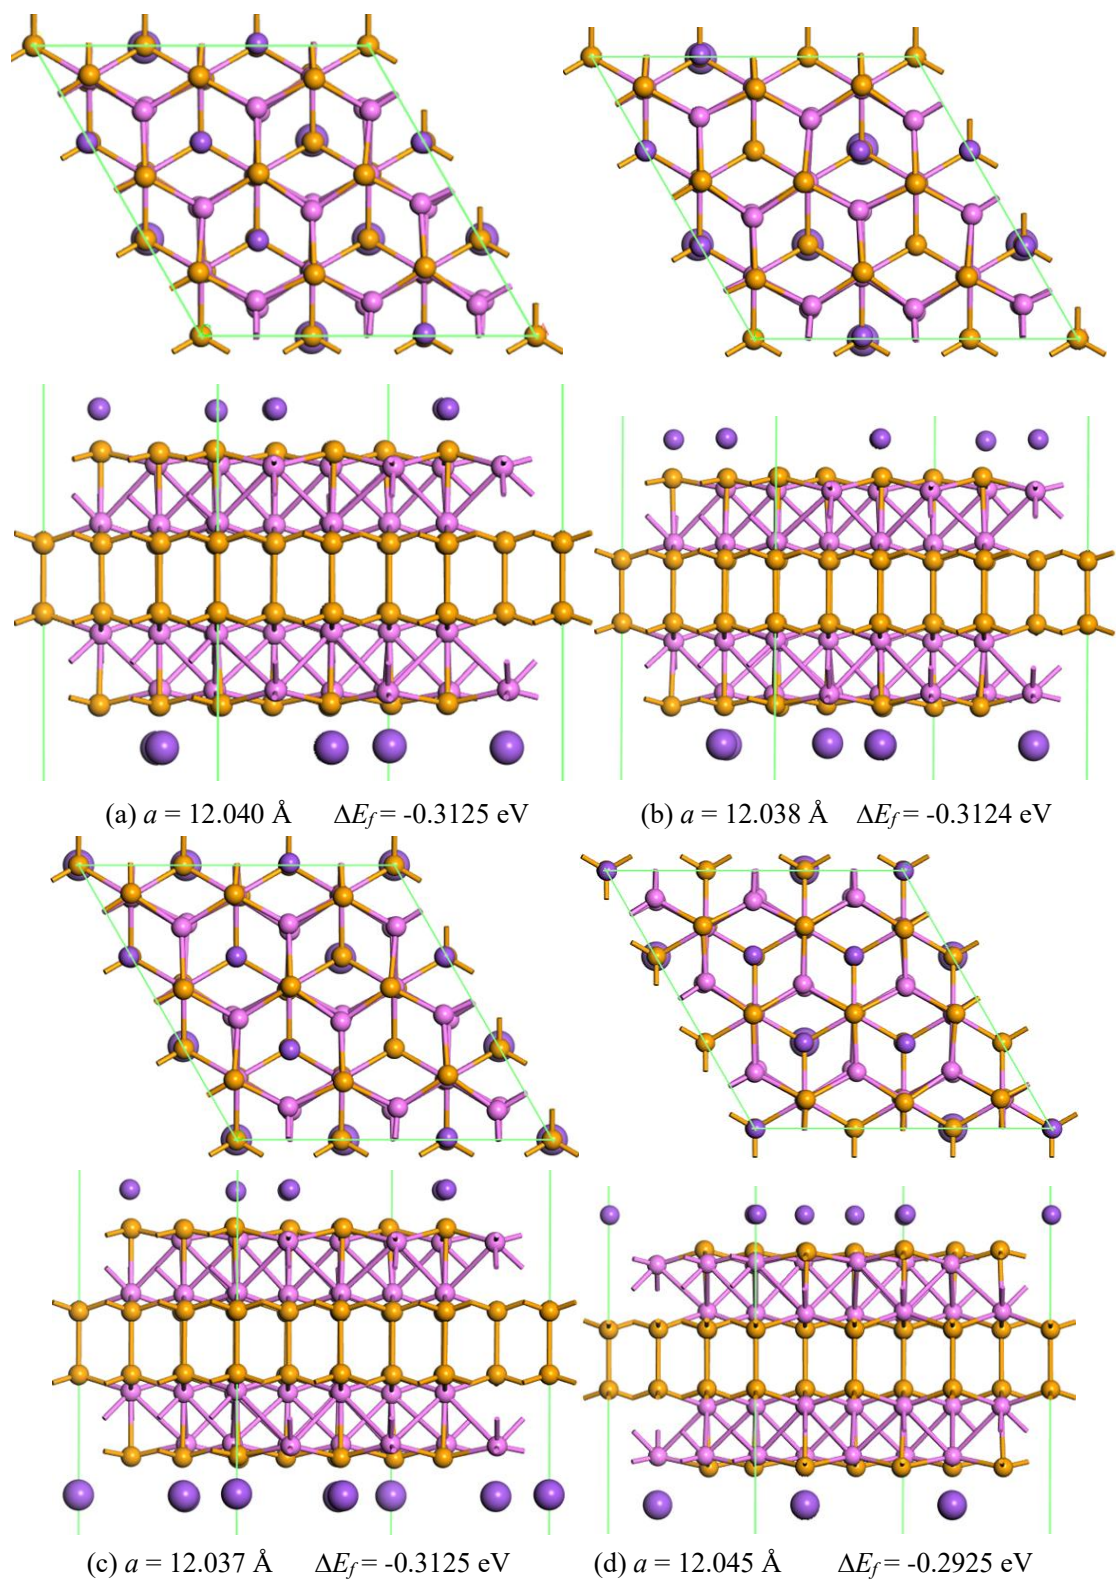

**Fig. S8** Top and front views of eight sodium atoms adsorbed on the  $3 \times 3 \times 1$   $\text{Cu}_4\text{Se}_4$  supercell. The atoms for which balls in different colors stand are the same as in Fig. S5.

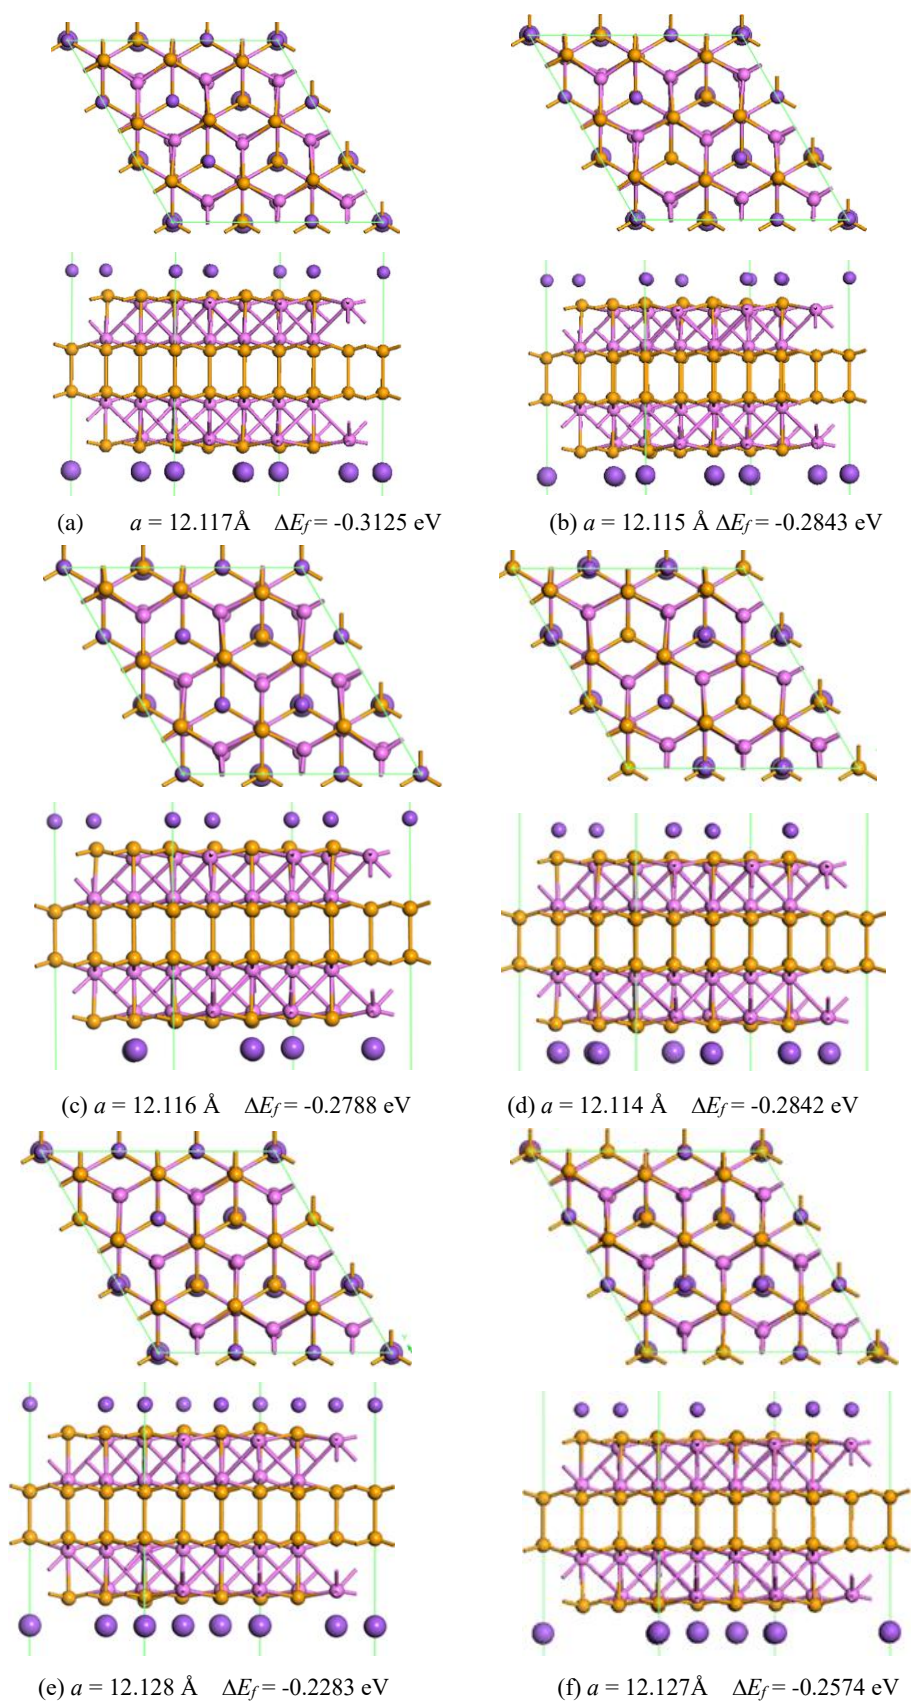

**Fig. S9** Top and front views of ten sodium atoms adsorbed on the  $3 \times 3 \times 1$   $\text{Cu}_4\text{Se}_4$  supercell. The atoms for which balls in different colors stand are the same as in Fig. S5.

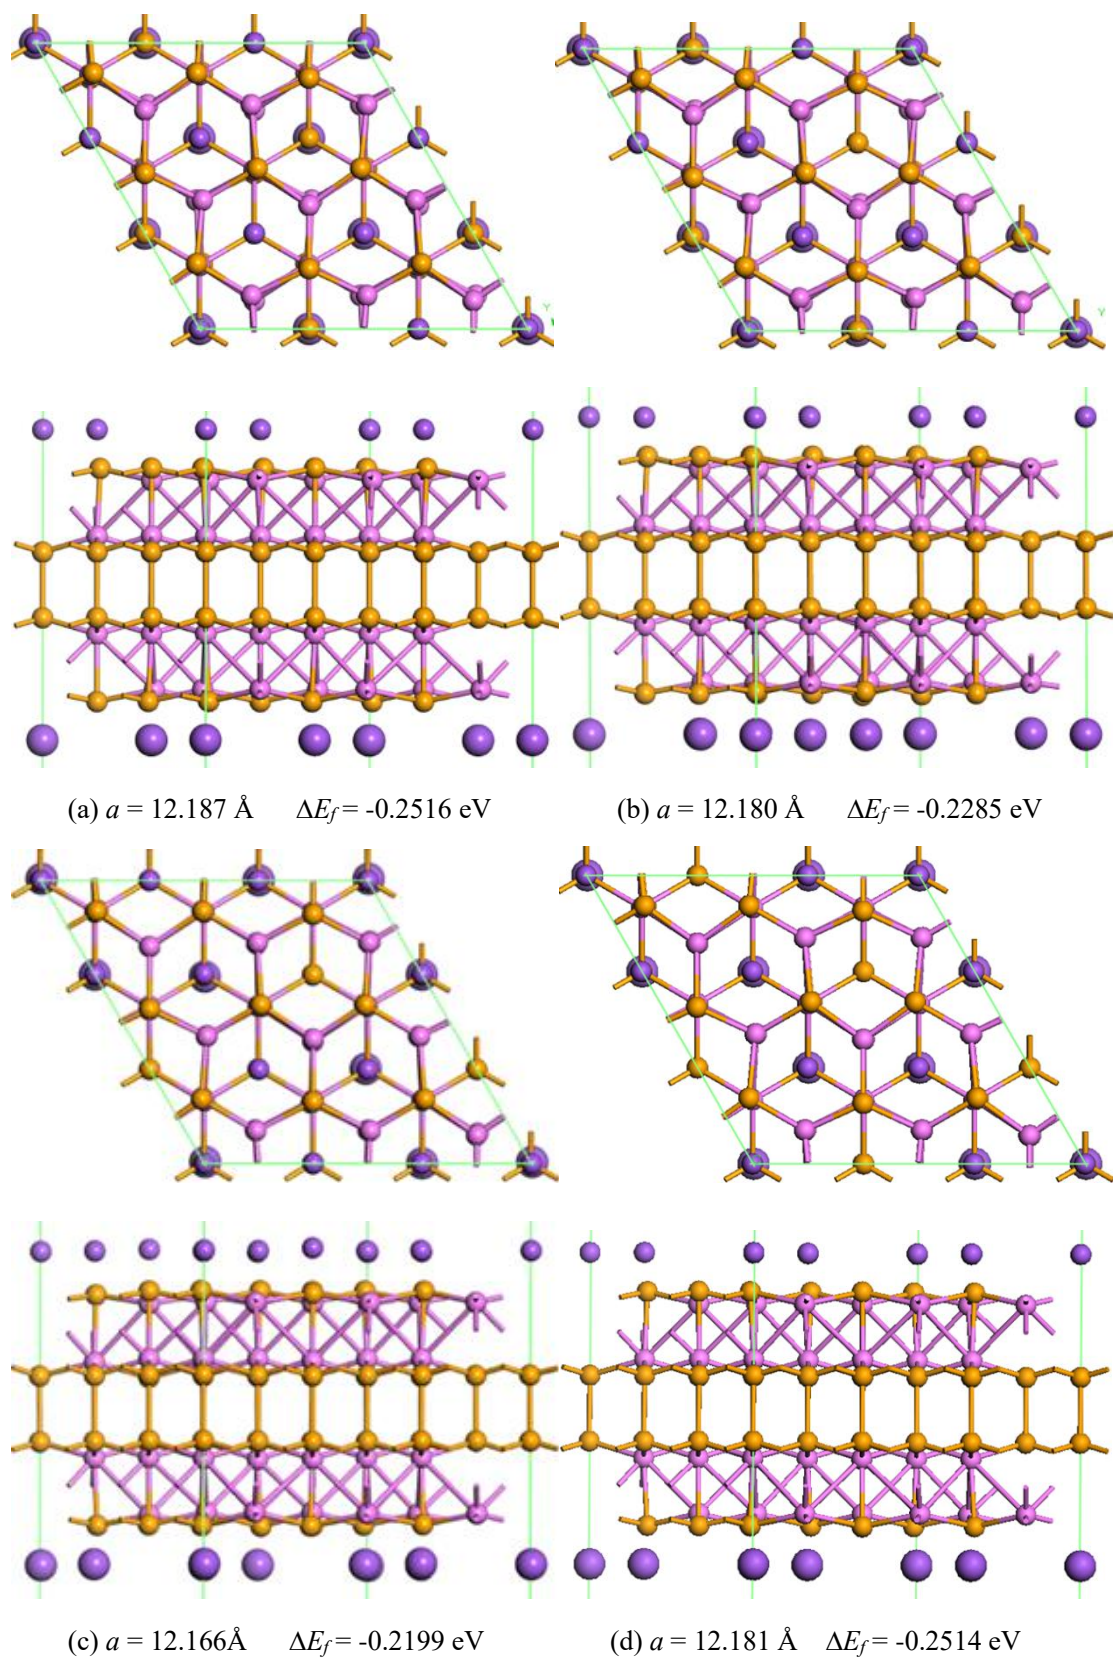

**Fig. S10** Top and front views of twelve sodium atoms adsorbed on the  $3 \times 3 \times 1$   $\text{Cu}_4\text{Se}_4$  supercell. The atoms for which balls in different colors stand are the same as in Fig. S5.

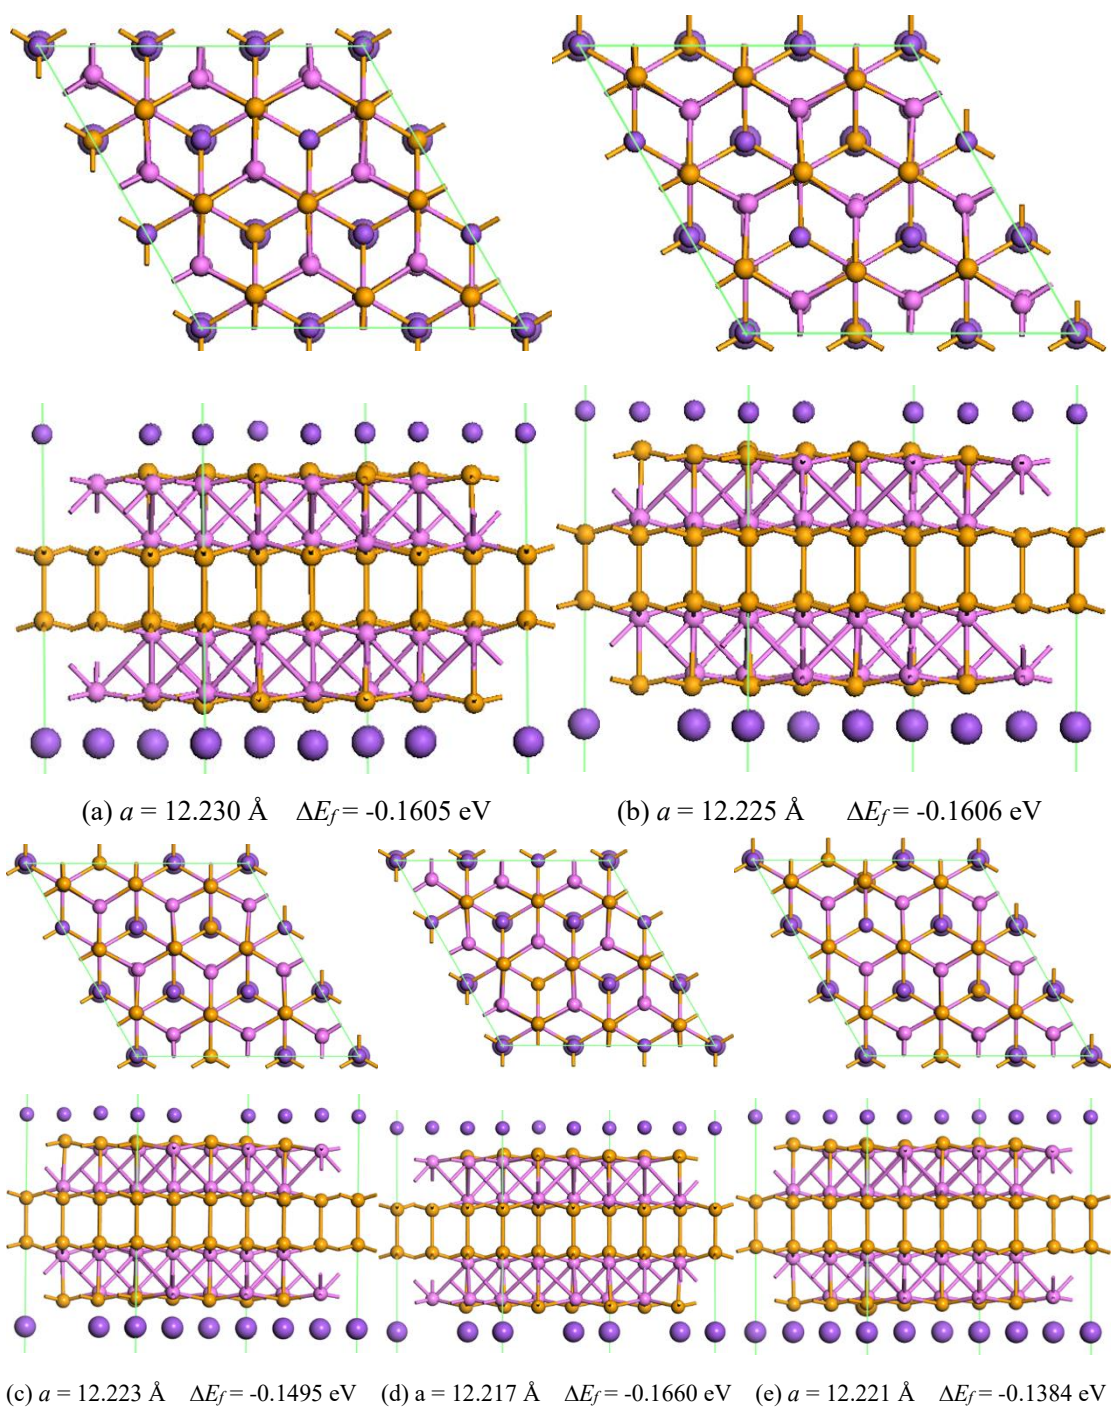

**Fig. S11** Top and front views of fourteen sodium atoms adsorbed on the  $3 \times 3 \times 1$   $\text{Cu}_4\text{Se}_4$  supercell. The atoms for which balls in different colors stand are the same as in Fig. S5.

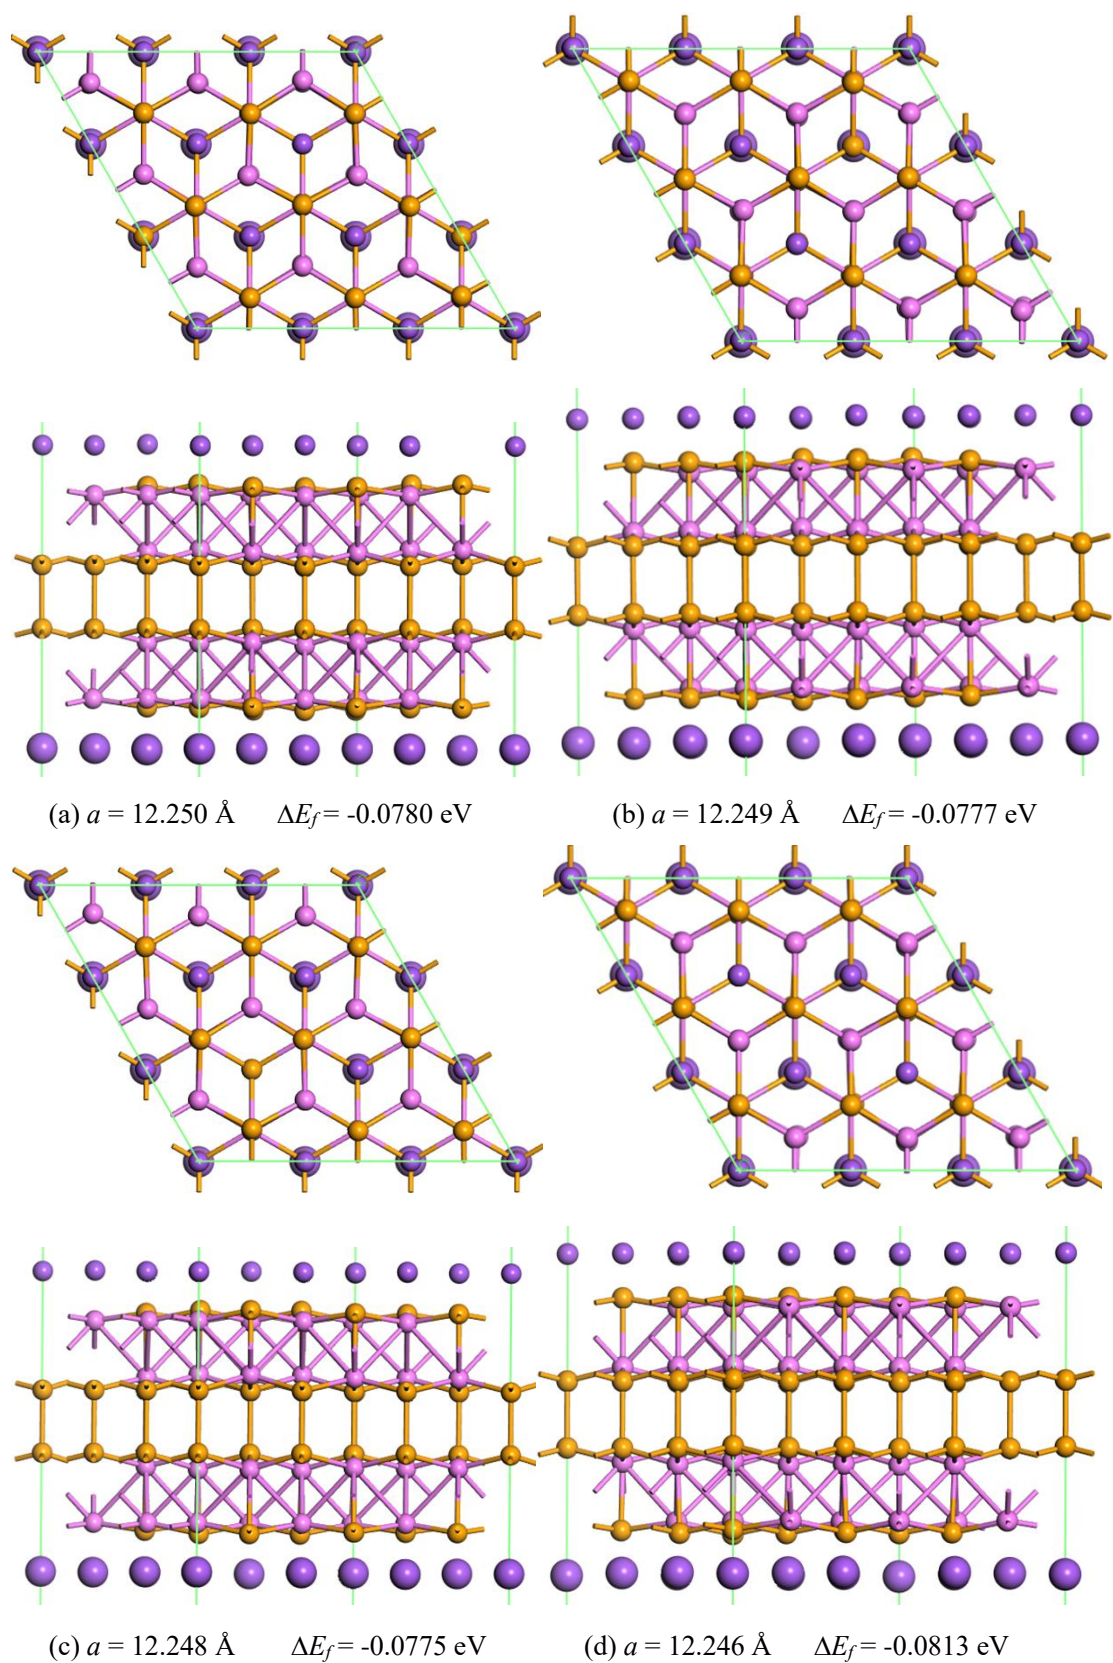

**Fig. S12** Top and front views of sixteen sodium atoms adsorbed on the  $3 \times 3 \times 1$   $\text{Cu}_4\text{Se}_4$  supercell. The atoms for which balls in different colors stand are the same as in Fig. S5.

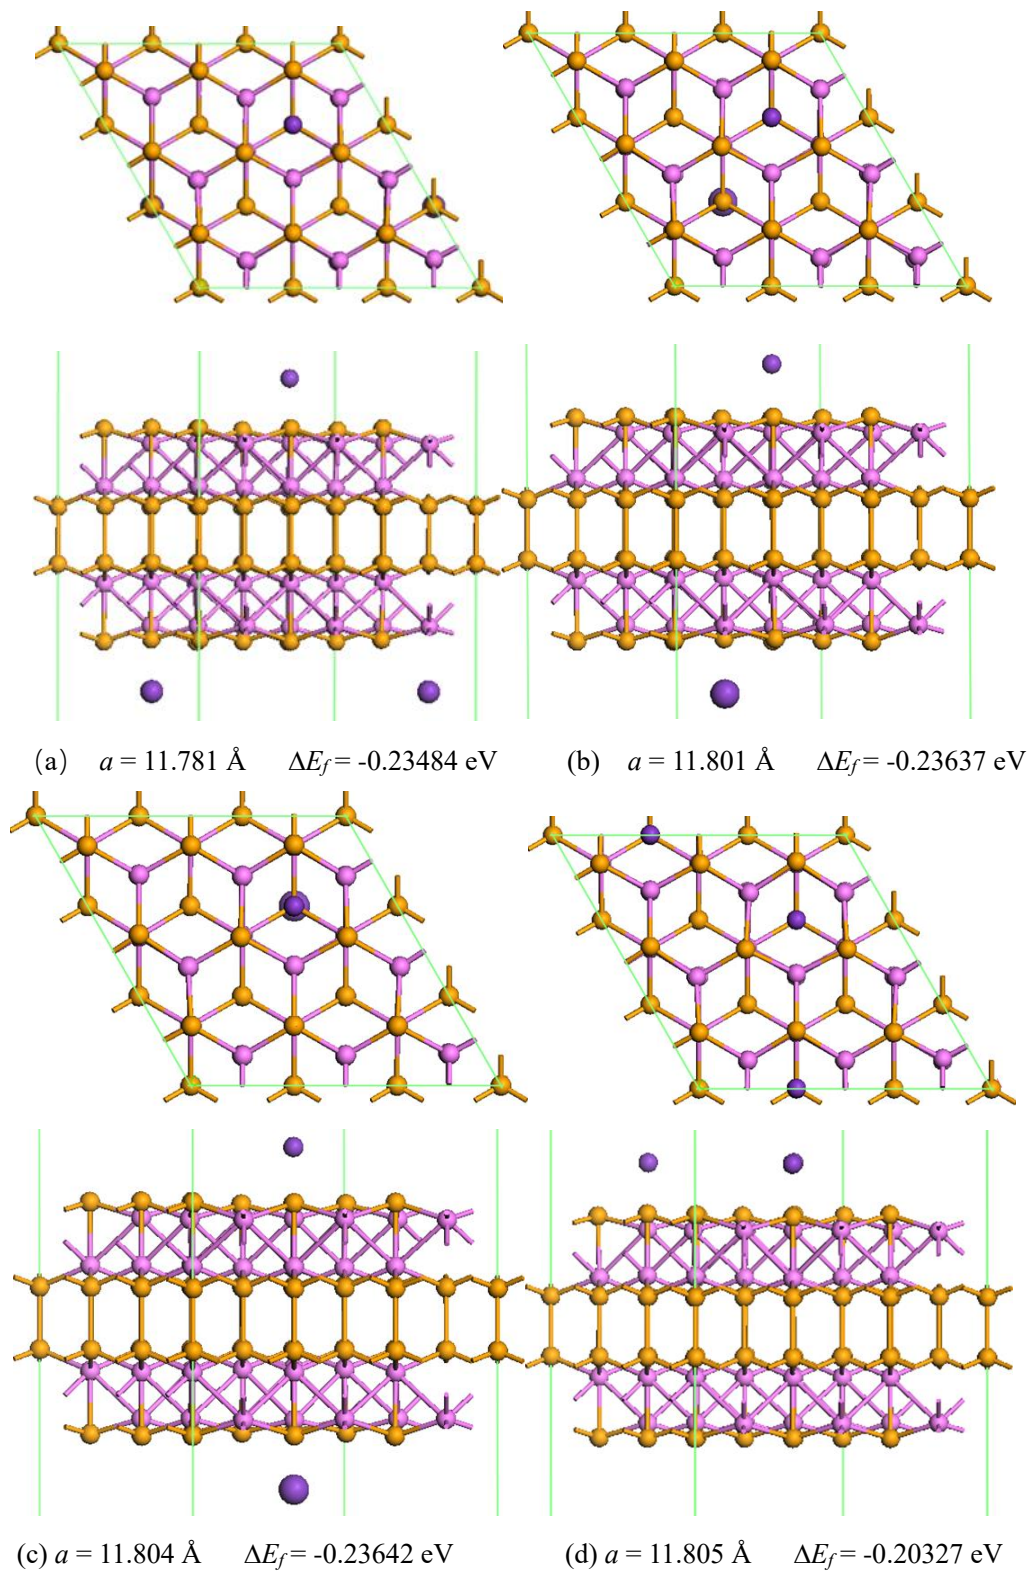

**Fig. S13** Top and front views of two potassium atoms adsorbed on the  $3 \times 3 \times 1$   $\text{Cu}_4\text{Se}_4$  supercell.

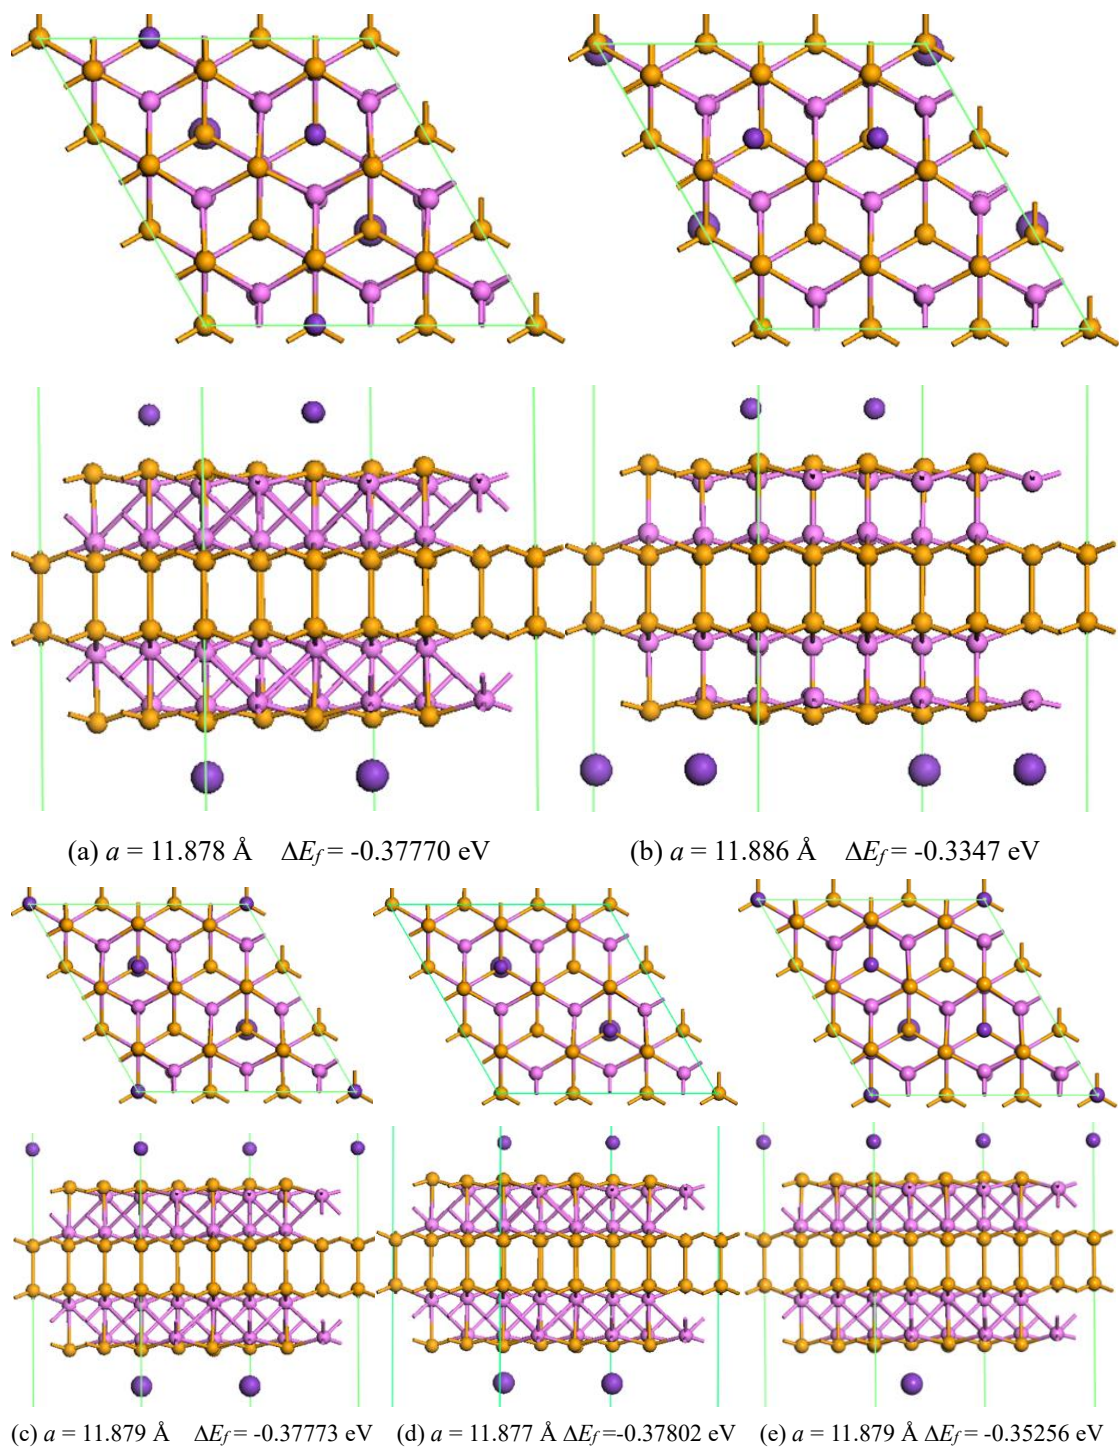

**Fig. S14** Top and front views of four potassium atoms adsorbed on the  $3 \times 3 \times 1$   $\text{Cu}_4\text{Se}_4$  supercell. The atoms for which balls in different colors stand are the same as in Fig. S13.

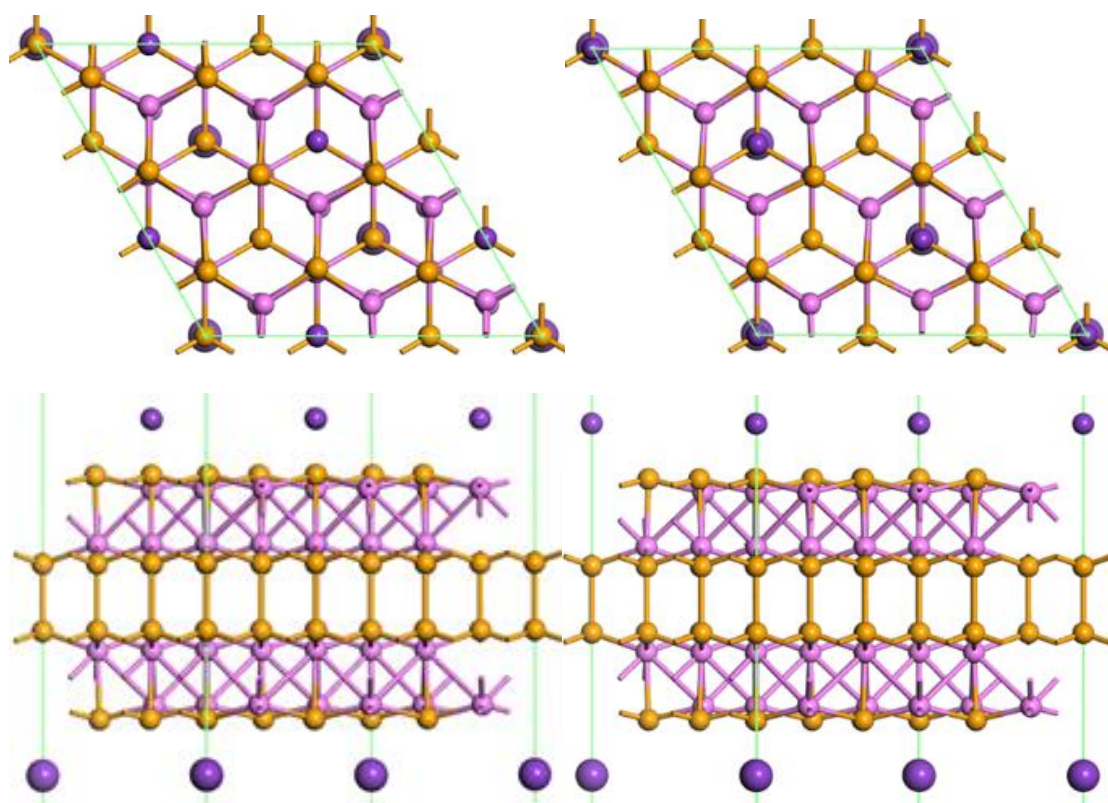

(a)  $a = 11.962 \text{ \AA}$   $\Delta E_f = -0.4535 \text{ eV}$

(b)  $a = 11.958 \text{ \AA}$   $\Delta E_f = -0.4534 \text{ eV}$

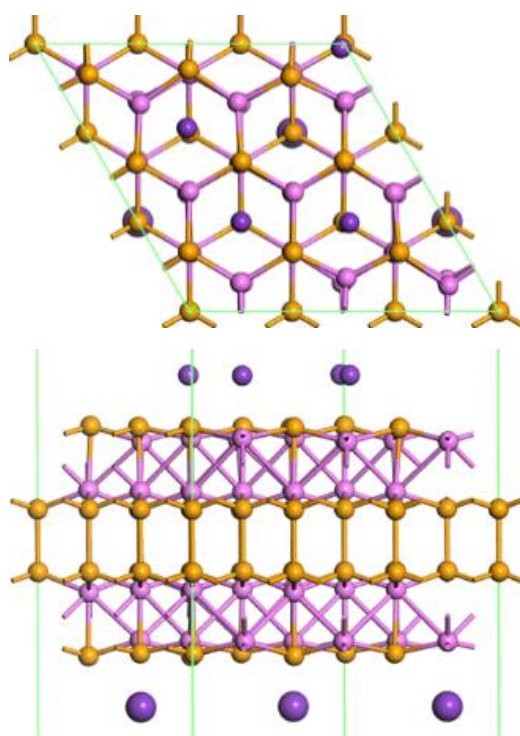

(c)  $a = 11.969 \text{ \AA}$   $\Delta E_f = -0.3735 \text{ eV}$

**Fig. S15** Top and front views of six potassium atoms adsorbed on the  $3 \times 3 \times 1$   $\text{Cu}_4\text{Se}_4$  supercell. The atoms for which balls in different colors stand are the same as in Fig. S13.



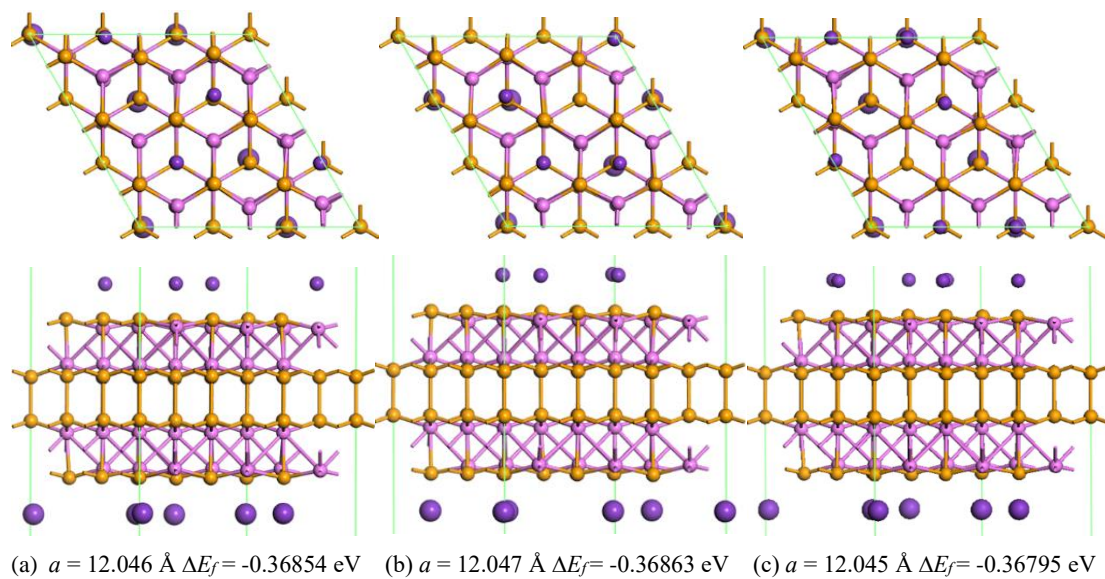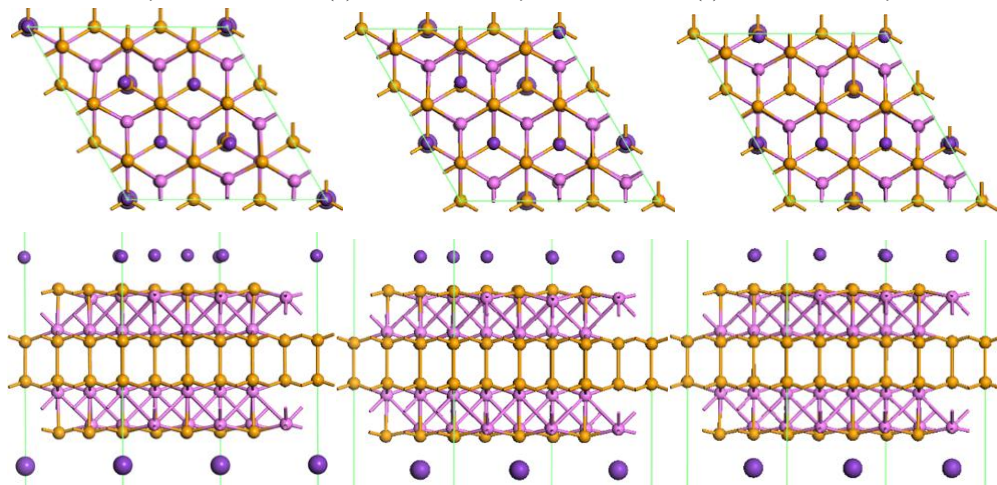

**Fig. S16** Top and front views of eight potassium atoms adsorbed on the  $3 \times 3 \times 1$   $\text{Cu}_4\text{Se}_4$  supercell. The atoms for which balls in different colors stand are the same as in Fig. S13.

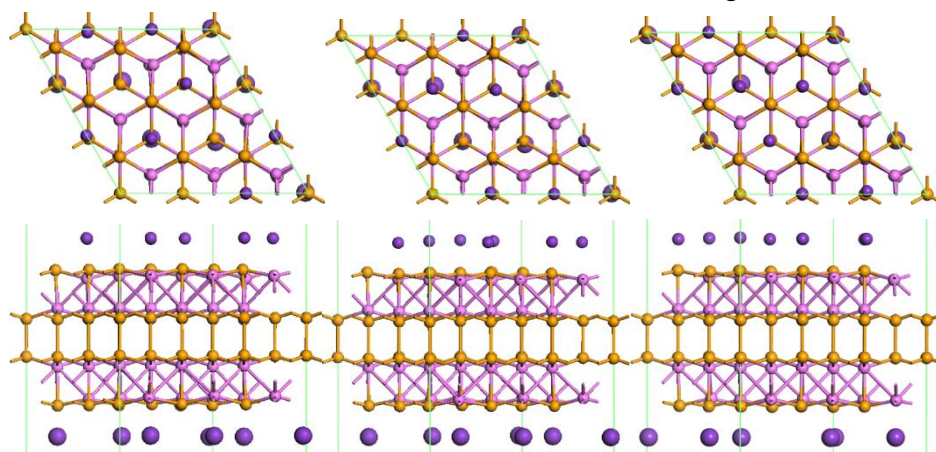

**Fig. S17** Top and front views of ten potassium atoms adsorbed on the  $3 \times 3 \times 1$   $\text{Cu}_4\text{Se}_4$  supercell. The atoms for which balls in different colors stand are the same as in Fig. S13.

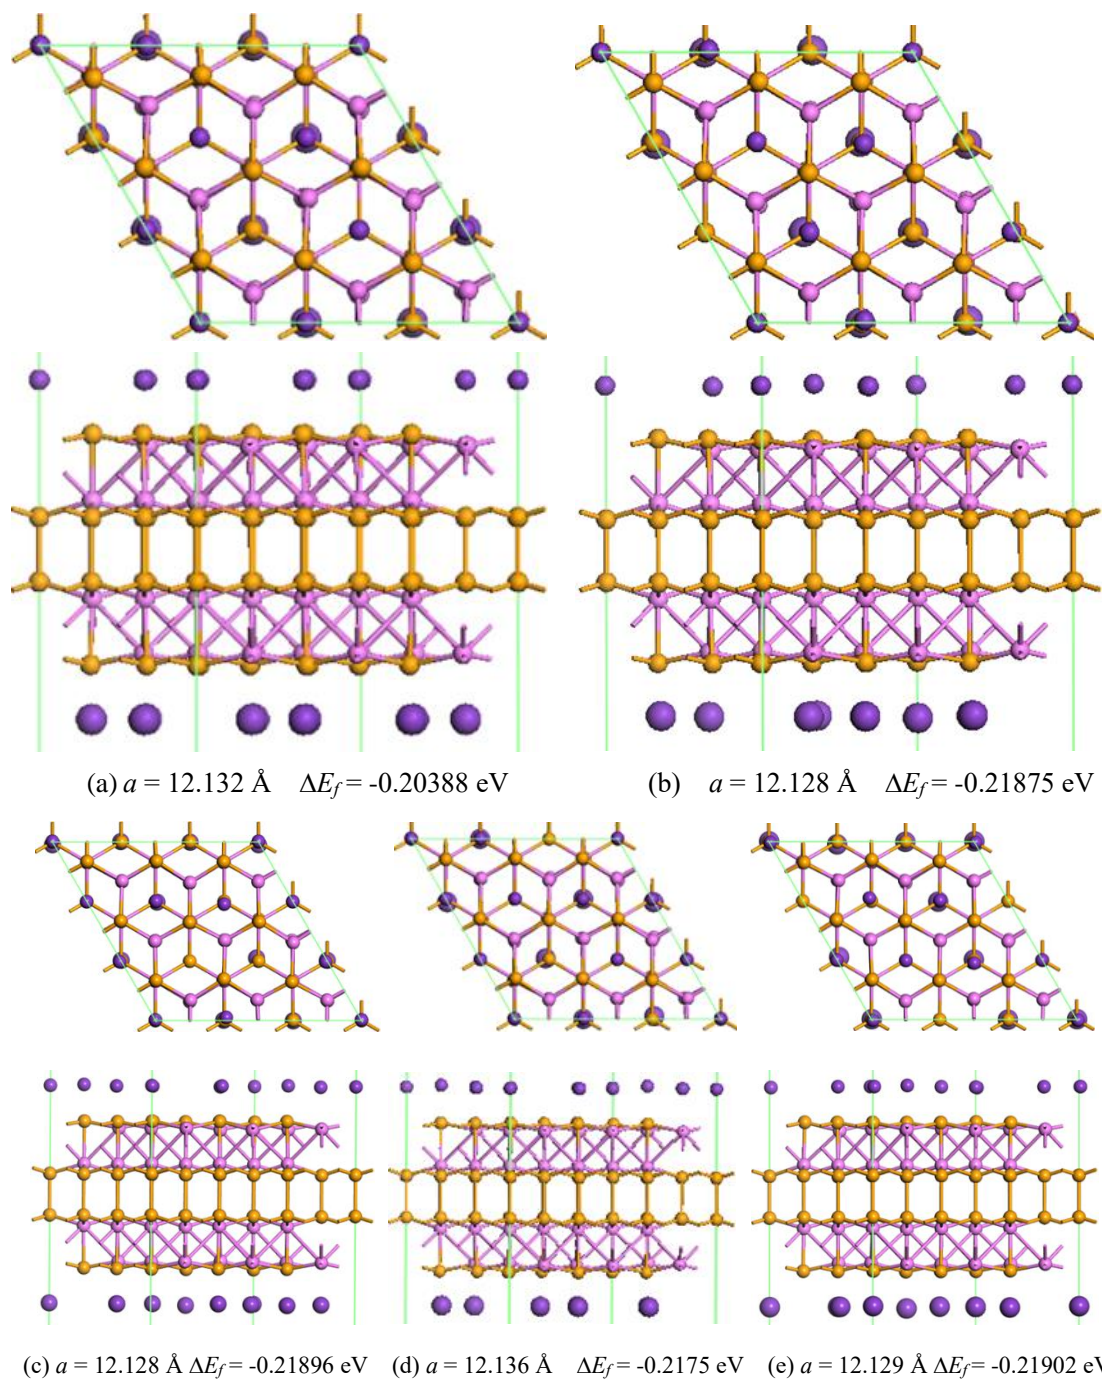

**Fig. S18** Top and front views of twelve potassium atoms adsorbed on the  $3 \times 3 \times 1$   $\text{Cu}_4\text{Se}_4$  supercell. The atoms for which balls in different colors stand are the same as in Fig. S13.

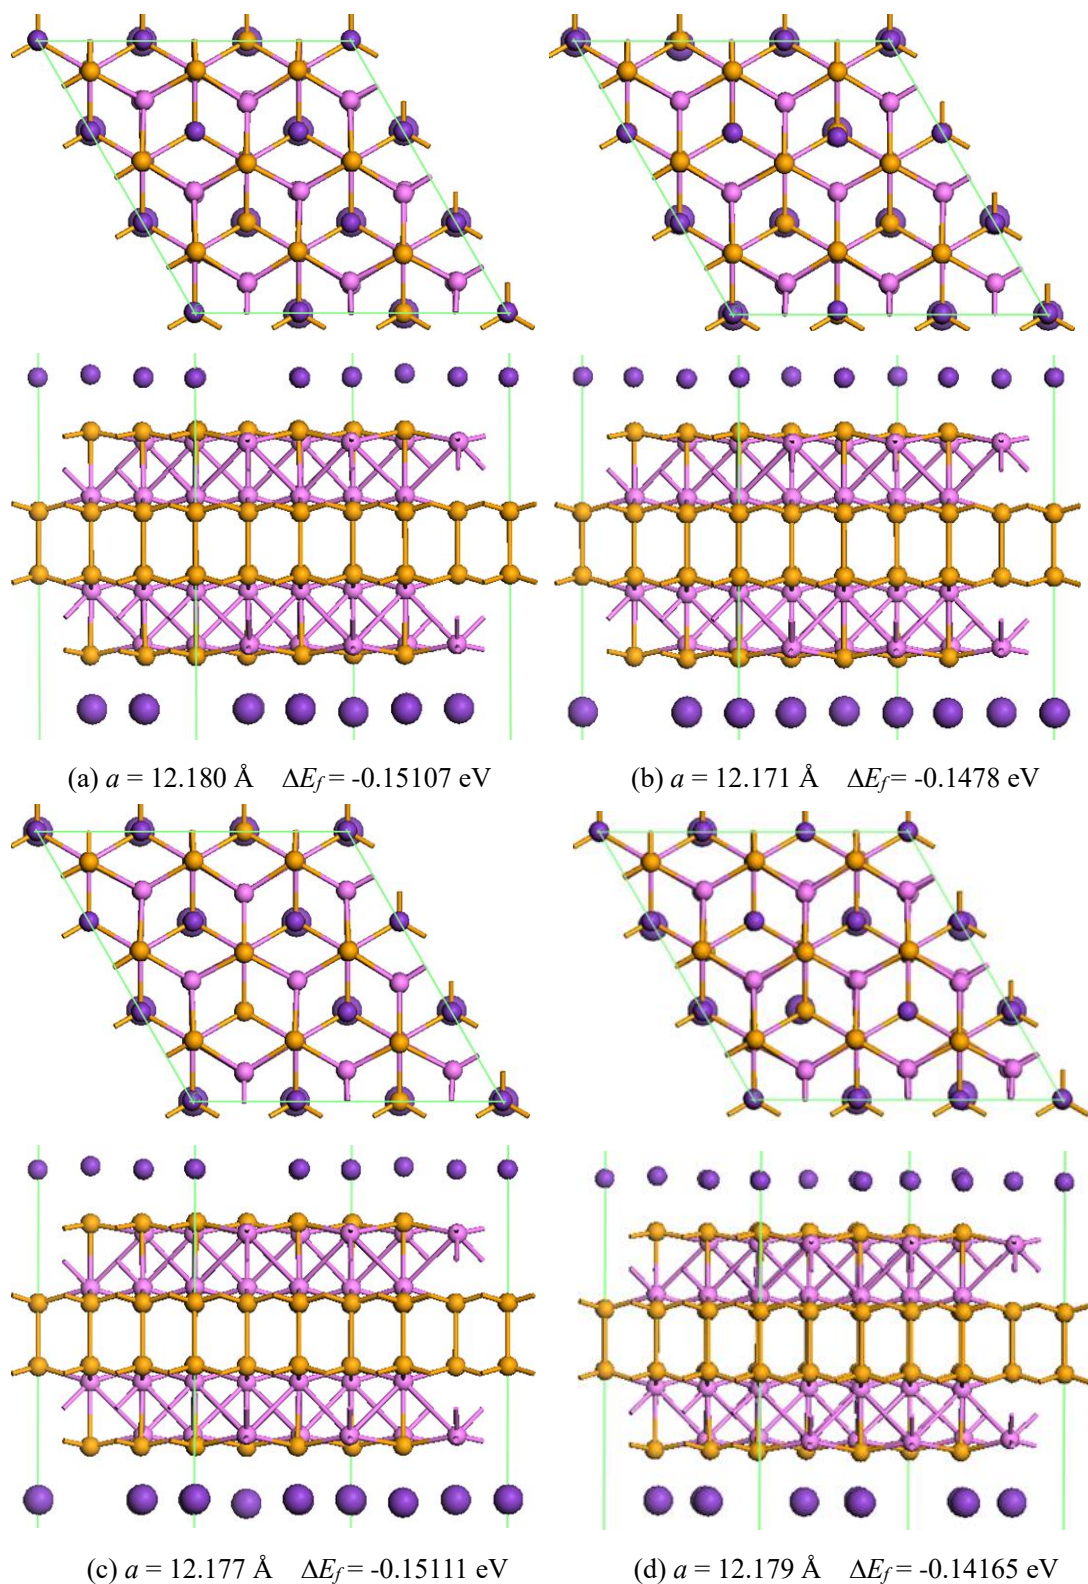

**Fig. S19** Top and front views of fourteen potassium atoms adsorbed on the  $3 \times 3 \times 1$   $\text{Cu}_4\text{Se}_4$  supercell. The atoms for which balls in different colors stand are the same as in Fig. S13.

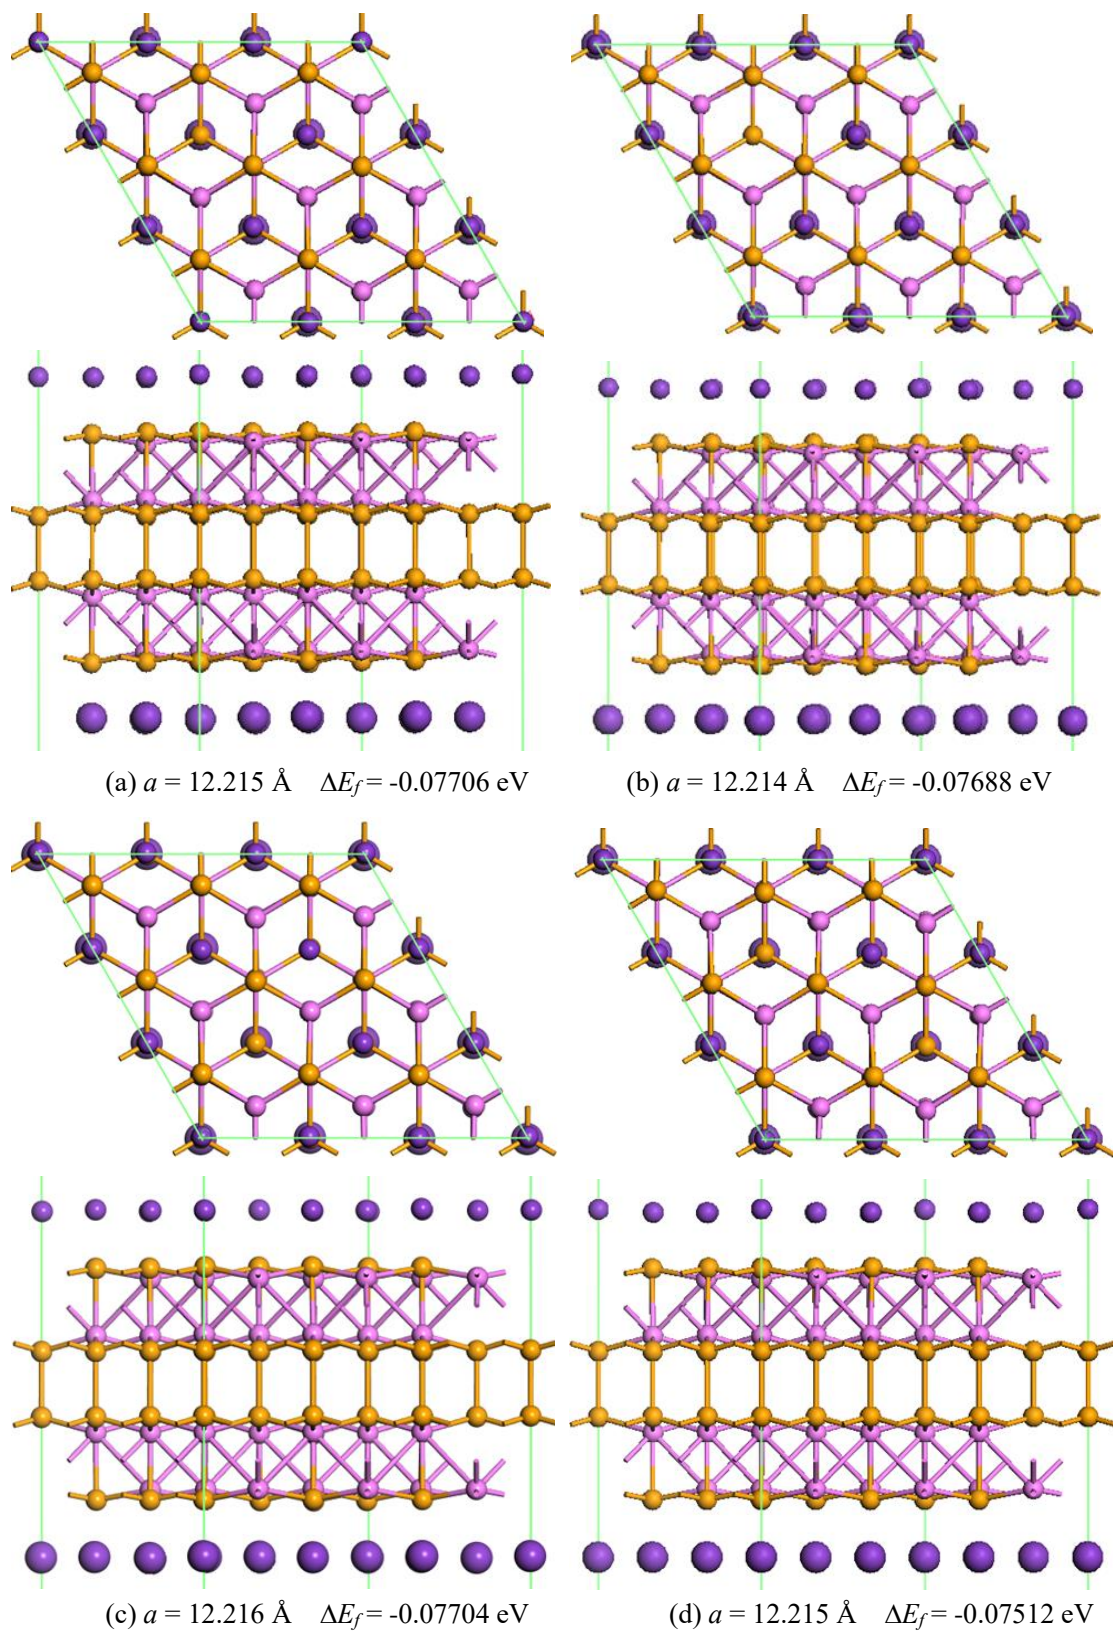

**Fig. S20** Top and front views of sixteen potassium atoms adsorbed on the  $3 \times 3 \times 1$   $\text{Cu}_4\text{Se}_4$  supercell. The atoms for which balls in different colors stand are the same as in Fig. S13.

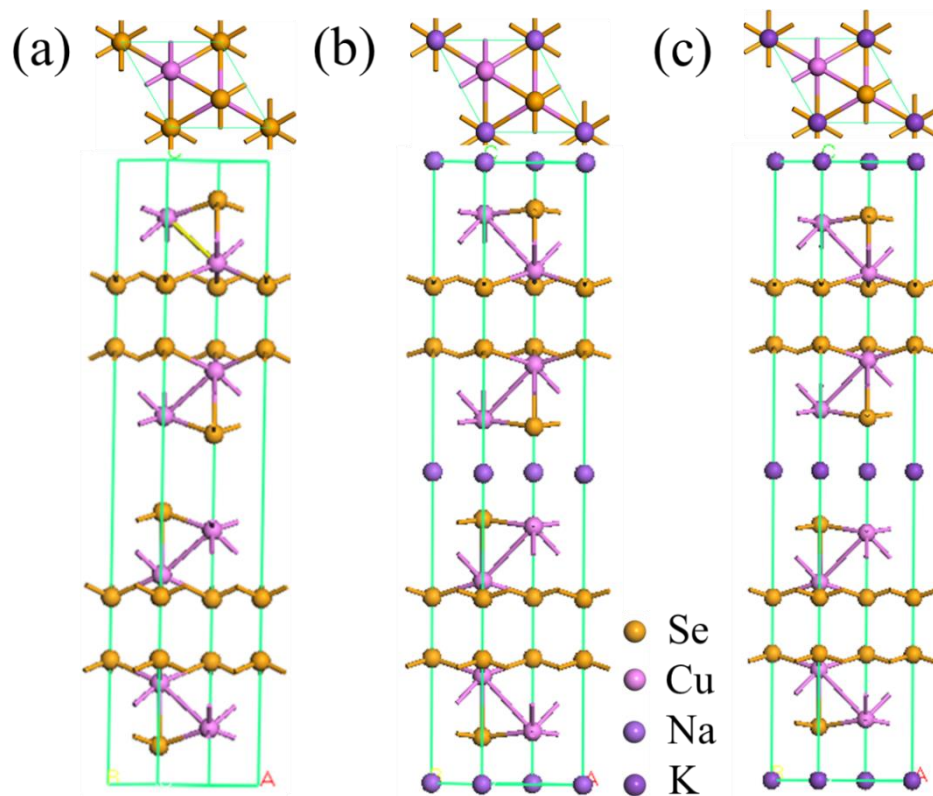

**Fig. S21** Top and front views of geometric structures of (a)  $\text{Cu}_4\text{Se}_4$ , (b)  $\text{NaCu}_4\text{Se}_4$  and (c)  $\text{KCu}_4\text{Se}_4$  crystals.

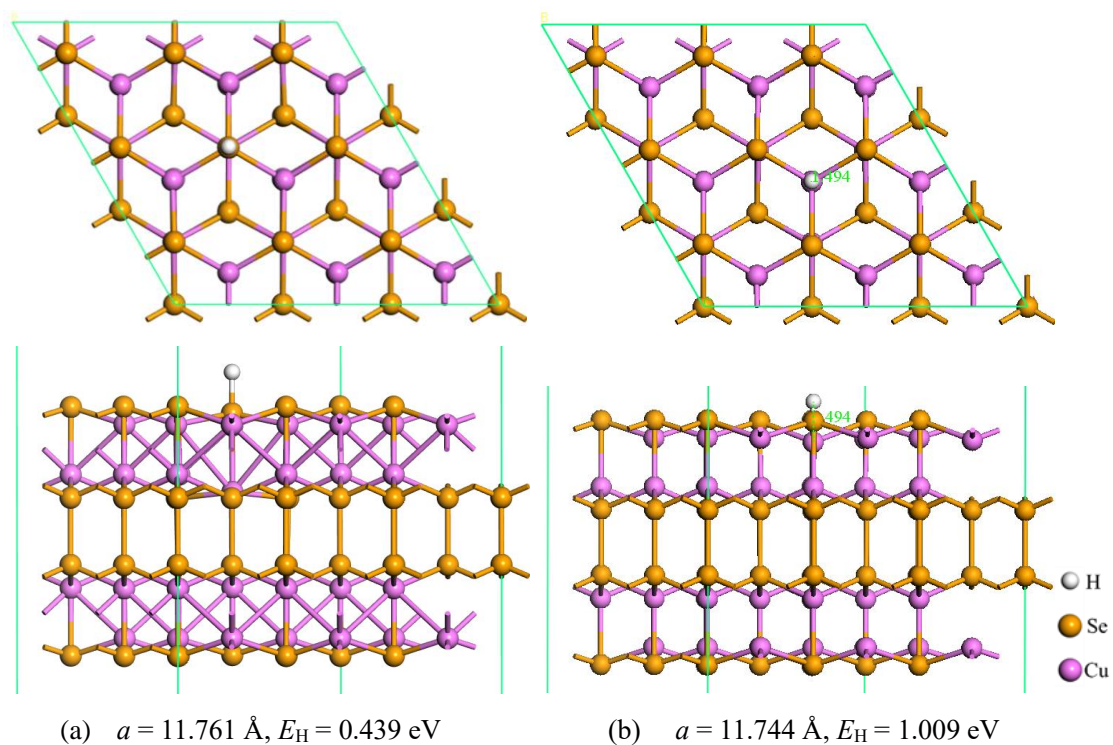

**Fig. S22** Top and front views of a proton adsorbed on the  $3 \times 3 \times 1$   $\text{Cu}_4\text{Se}_4$  supercell: (a) adsorbed on top of S atom and (b) on top of Cu atom.

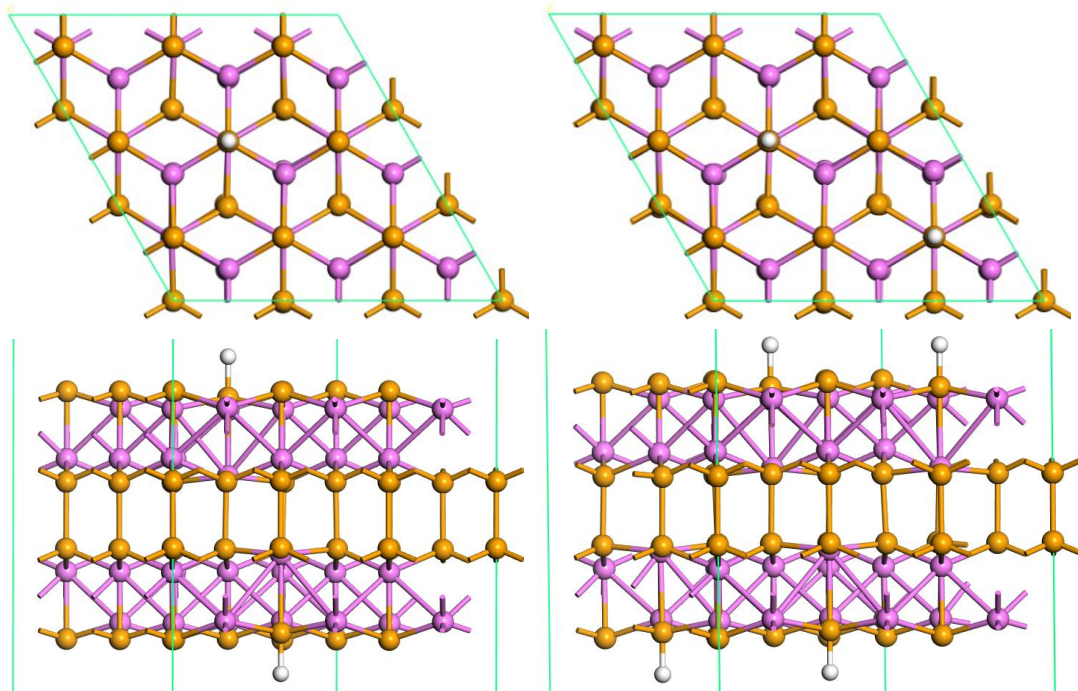

(a)  $\text{H}_2(\text{Cu}_4\text{Se}_4)_9$ ,  $a = 11.802 \text{ \AA}$ ,  $E_{\text{H}} = 0.435 \text{ eV}$     (b)  $\text{H}_4(\text{Cu}_4\text{Se}_4)_9$ ,  $a = 11.861 \text{ \AA}$ ,  $E_{\text{H}} = 0.438 \text{ eV}$

**Fig. S23** Top and front views of (a) two and (b) four protons adsorbed on the  $3 \times 3 \times 1$   $\text{Cu}_4\text{Se}_4$  supercell. The atoms for which balls in different colors stand are the same as in Fig. S22.

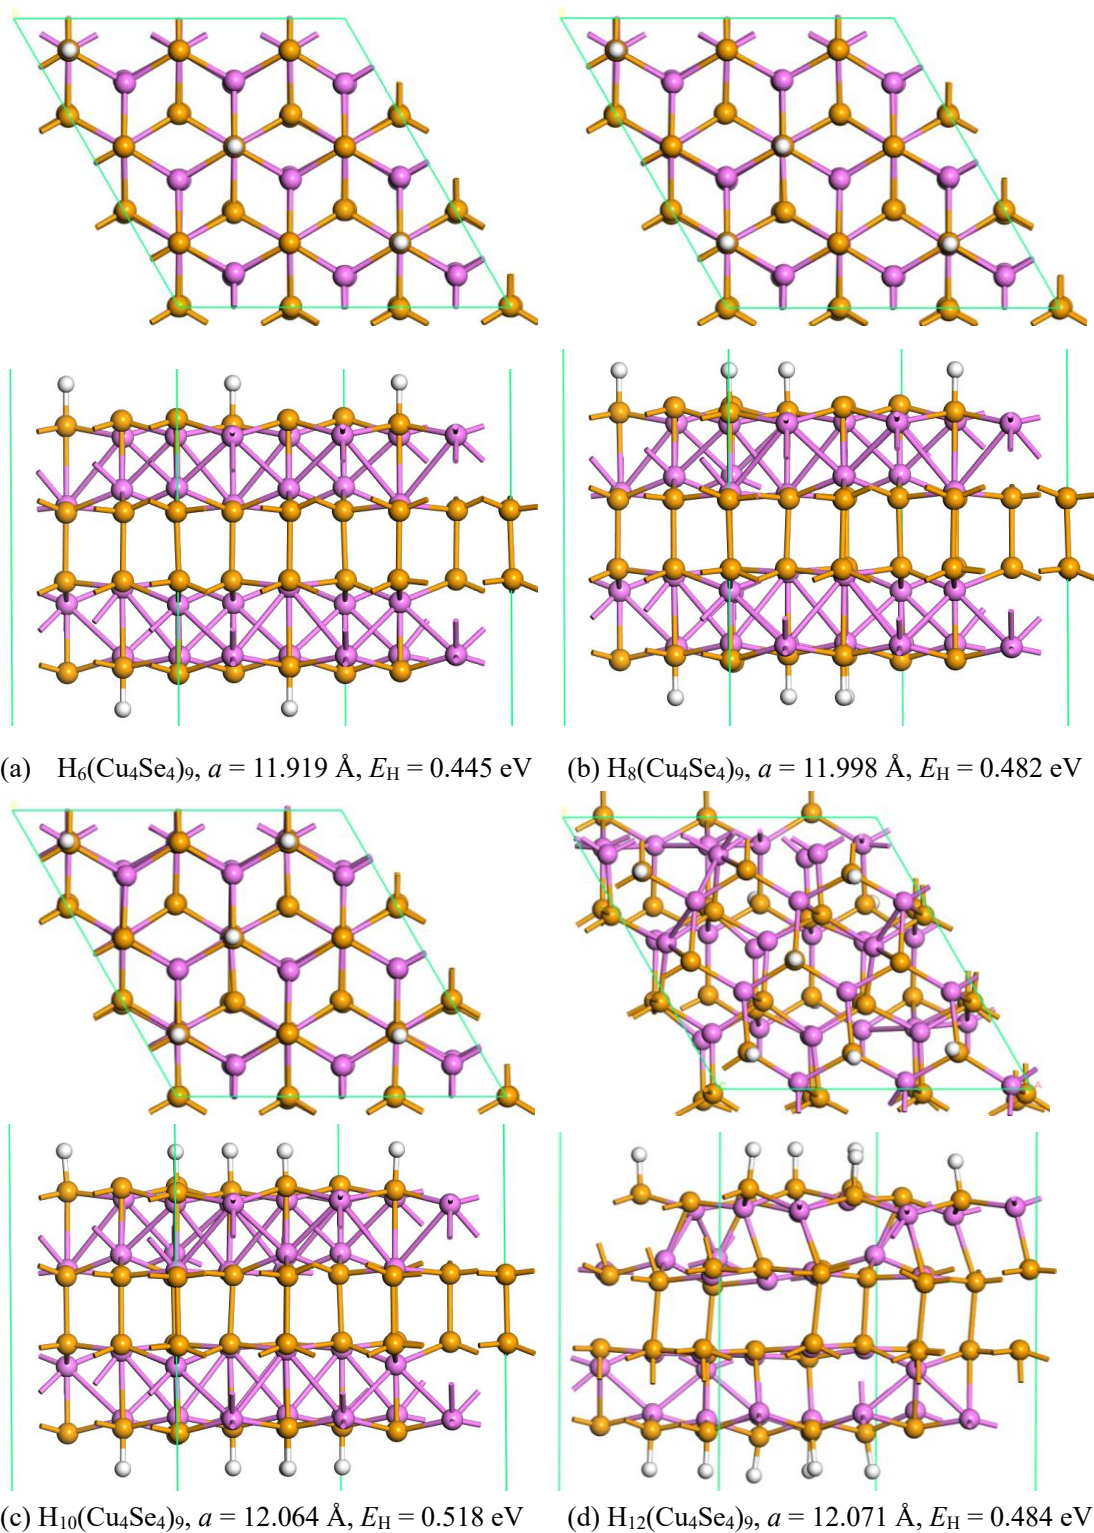

**Fig. S24** Top and front views of (a) six, (b) eight, (c) ten and (d) twelve protons adsorbed on the  $3 \times 3 \times 1$   $\text{Cu}_4\text{Se}_4$  supercell. The atoms for which balls in different colors stand are the same as in Fig. S22.

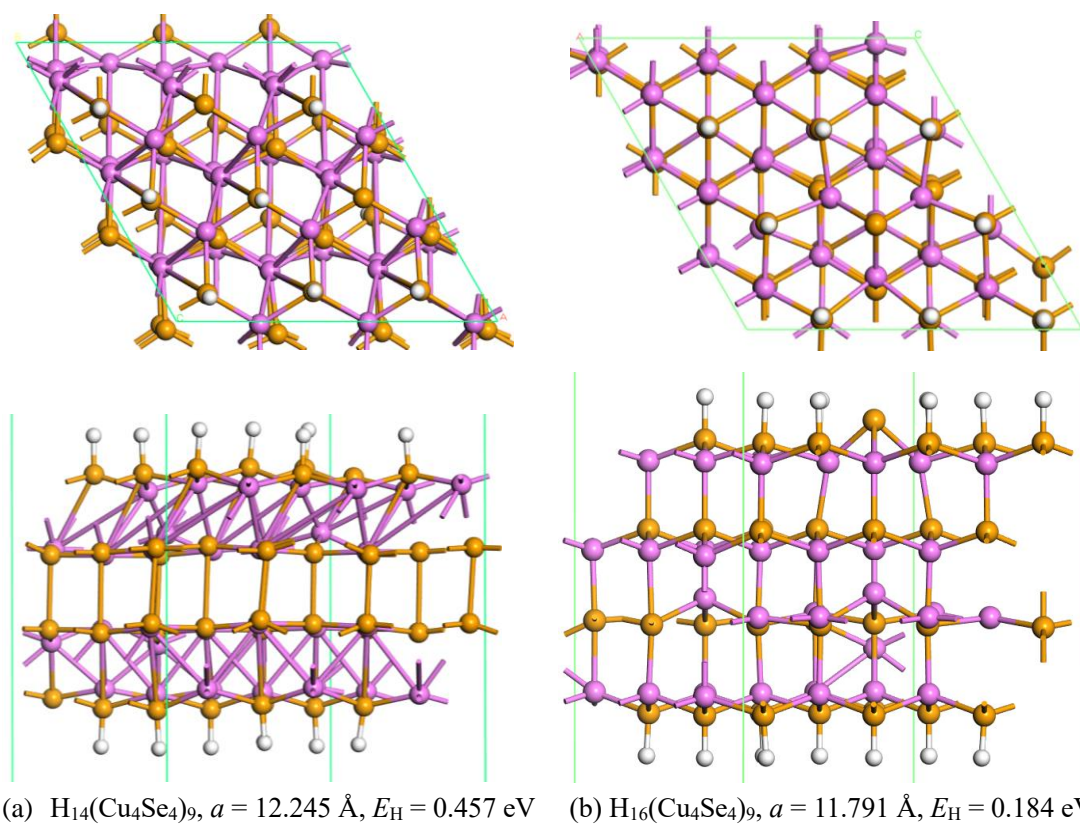

**Fig. S25** Top and front views of (a) fourteen and (b) sixteen protons adsorbed on the  $3 \times 3 \times 1$   $\text{Cu}_4\text{Se}_4$  supercell. The atoms for which balls in different colors stand are the same as in Fig. S22.

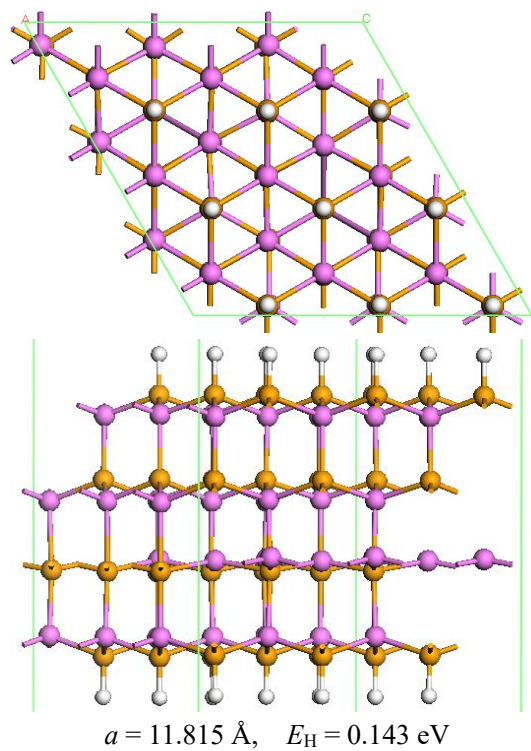

**Fig. S26** Top and front views of eighteen protons adsorbed on the  $3 \times 3 \times 1$   $\text{Cu}_4\text{Se}_4$  supercell. The atoms for which balls in different colors stand are the same as in Fig. S22.
